# Supplementary material for: Evaluating the provision of Further Enabling Care at Home (FECH+) for informal caregivers of older adults discharged home from hospital: protocol for a multicentre randomised controlled trial
Source: PubMed Central journal article supplement — BMJ Open. 2021 Jun 21;11(6):e046600. doi: 10.1136/bmjopen-2020-046600 (PMC8217916; doi:10.1136/bmjopen-2020-046600), 2021-06-21
Supplement: bmjopen-2020-046600.draft_revisions.pdf [file bmjopen-2020-046600.draft_revisions.pdf]

# BMJ Open

BMJ Open is committed to open peer review. As part of this commitment we make the peer review history of every article we publish publicly available.

When an article is published we post the peer reviewers' comments and the authors' responses online. We also post the versions of the paper that were used during peer review. These are the versions that the peer review comments apply to.

The versions of the paper that follow are the versions that were submitted during the peer review process. They are not the versions of record or the final published versions. They should not be cited or distributed as the published version of this manuscript.

BMJ Open is an open access journal and the full, final, typeset and author-corrected version of record of the manuscript is available on our site with no access controls, subscription charges or pay-per-view fees (<http://bmjopen.bmj.com>).

If you have any questions on BMJ Open's open peer review process please email [info.bmjopen@bmj.com](mailto:info.bmjopen@bmj.com)

# BMJ Open

## Evaluating the provision of Further Enabling Care at Home (FECH+) for informal caregivers of older adults discharged home from hospital – protocol for a multicentre randomised controlled trial

|                               |                                                                                                                                                                                                                                                                                                                                                                                                                                                                                                                                                                                                                                                                                                                                                                                                                                                                                                                                                                                                                                                                                                                                                                                                                                                                                                                                                                                                                                                                                                                                                                                                                    |
|-------------------------------|--------------------------------------------------------------------------------------------------------------------------------------------------------------------------------------------------------------------------------------------------------------------------------------------------------------------------------------------------------------------------------------------------------------------------------------------------------------------------------------------------------------------------------------------------------------------------------------------------------------------------------------------------------------------------------------------------------------------------------------------------------------------------------------------------------------------------------------------------------------------------------------------------------------------------------------------------------------------------------------------------------------------------------------------------------------------------------------------------------------------------------------------------------------------------------------------------------------------------------------------------------------------------------------------------------------------------------------------------------------------------------------------------------------------------------------------------------------------------------------------------------------------------------------------------------------------------------------------------------------------|
| Journal:                      | <i>BMJ Open</i>                                                                                                                                                                                                                                                                                                                                                                                                                                                                                                                                                                                                                                                                                                                                                                                                                                                                                                                                                                                                                                                                                                                                                                                                                                                                                                                                                                                                                                                                                                                                                                                                    |
| Manuscript ID                 | bmjopen-2020-046600                                                                                                                                                                                                                                                                                                                                                                                                                                                                                                                                                                                                                                                                                                                                                                                                                                                                                                                                                                                                                                                                                                                                                                                                                                                                                                                                                                                                                                                                                                                                                                                                |
| Article Type:                 | Protocol                                                                                                                                                                                                                                                                                                                                                                                                                                                                                                                                                                                                                                                                                                                                                                                                                                                                                                                                                                                                                                                                                                                                                                                                                                                                                                                                                                                                                                                                                                                                                                                                           |
| Date Submitted by the Author: | 04-Nov-2020                                                                                                                                                                                                                                                                                                                                                                                                                                                                                                                                                                                                                                                                                                                                                                                                                                                                                                                                                                                                                                                                                                                                                                                                                                                                                                                                                                                                                                                                                                                                                                                                        |
| Complete List of Authors:     | Hill, Anne-Marie; Curtin University, School of Physiotherapy and Exercise Science; Curtin University, School of Nursing, Midwifery and Paramedicine<br>Moorin, Rachael; Curtin University, School of Public Health<br>Slatyer, Susan; Murdoch University, Discipline of School of Nursing<br>Bryant, Christina; University of Melbourne, Melbourne School of Psychological Sciences<br>Hill, Keith; Monash University, Rehabilitation Ageing and Independent Living (RAIL) Research Centre<br>Waldron, Nicholas; Armadale Health Service<br>Aoun, Samar ; La Trobe University, School of Psychology and Public Health; Perron Institute for Neurological and Translational Science<br>Kamdar, Ami; Sir Charles Gairdner Hospital, Department of General Medicine<br>Grealish, Laurie; Gold Coast Hospital and Health Services; Griffith University, School of Nursing and Midwifery Nathan and Gold Coast<br>Reberger, Caroline; Sir Charles Gairdner Hospital, Department of Rehabilitation and Aged Care<br>Jones, Cindy; Griffith University, Menzies Health Institute Queensland; Bond University, Faculty of Health Sciences & Medicine<br>Bronson, Mary; Sir Charles Gairdner Hospital, Medical Division<br>Bulsara, Max; The University of Notre Dame Australia, Institute for Health Research<br>Maher, Sean; Sir Charles Gairdner Hospital, Department of Rehabilitation and Aged Care<br>Claverie, Tracey; Gold Coast Hospital and Health Services<br>Moyle, Wendy; Griffith University, School of Nursing and Midwifery Nathan and Gold Coast; Griffith University, Menzies Health Institute Queensland |
| Keywords:                     | GERIATRIC MEDICINE, INTERNAL MEDICINE, Quality in health care < HEALTH SERVICES ADMINISTRATION & MANAGEMENT                                                                                                                                                                                                                                                                                                                                                                                                                                                                                                                                                                                                                                                                                                                                                                                                                                                                                                                                                                                                                                                                                                                                                                                                                                                                                                                                                                                                                                                                                                        |
|                               |                                                                                                                                                                                                                                                                                                                                                                                                                                                                                                                                                                                                                                                                                                                                                                                                                                                                                                                                                                                                                                                                                                                                                                                                                                                                                                                                                                                                                                                                                                                                                                                                                    |

1  
2  
3  
4  
5  
6  
7  
8  
9  
10  
11  
12  
13  
14  
15  
16  
17  
18  
19  
20  
21  
22  
23  
24  
25  
26  
27  
28  
29  
30  
31  
32  
33  
34  
35  
36  
37  
38  
39  
40  
41  
42  
43  
44  
45  
46  
47  
48  
49  
50  
51  
52  
53  
54  
55  
56  
57  
58  
59  
60

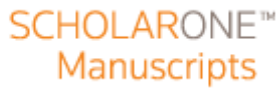

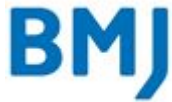

I, the Submitting Author has the right to grant and does grant on behalf of all authors of the Work (as defined in the below author licence), an exclusive licence and/or a non-exclusive licence for contributions from authors who are: i) UK Crown employees; ii) where BMJ has agreed a CC-BY licence shall apply, and/or iii) in accordance with the terms applicable for US Federal Government officers or employees acting as part of their official duties; on a worldwide, perpetual, irrevocable, royalty-free basis to BMJ Publishing Group Ltd ("BMJ") its licensees and where the relevant Journal is co-owned by BMJ to the co-owners of the Journal, to publish the Work in this journal and any other BMJ products and to exploit all rights, as set out in our [licence](#).

The Submitting Author accepts and understands that any supply made under these terms is made by BMJ to the Submitting Author unless you are acting as an employee on behalf of your employer or a postgraduate student of an affiliated institution which is paying any applicable article publishing charge ("APC") for Open Access articles. Where the Submitting Author wishes to make the Work available on an Open Access basis (and intends to pay the relevant APC), the terms of reuse of such Open Access shall be governed by a Creative Commons licence – details of these licences and which [Creative Commons](#) licence will apply to this Work are set out in our licence referred to above.

Other than as permitted in any relevant BMJ Author's Self Archiving Policies, I confirm this Work has not been accepted for publication elsewhere, is not being considered for publication elsewhere and does not duplicate material already published. I confirm all authors consent to publication of this Work and authorise the granting of this licence.

**Title**

Evaluating the provision of Further Enabling Care at Home (FECH+) for informal caregivers of older adults discharged home from hospital – protocol for a multicentre randomised controlled trial

**Authors**

Anne-Marie Hill,<sup>1,2</sup> Rachael Moorin,<sup>3</sup> Susan Slayter,<sup>4</sup> Christina Bryant,<sup>5</sup> Keith Hill,<sup>6</sup> Nicholas Waldron,<sup>7</sup> Samar Aoun,<sup>8,9</sup> Ami Kamdar,<sup>10</sup> Laurie Grealish,<sup>11,12,13</sup> Caroline Reberger,<sup>14</sup> Cindy Jones,<sup>12,15</sup> Mary Bronson,<sup>16</sup> Max Bulsara,<sup>17</sup> Sean Maher,<sup>14</sup> Tracey Claverie,<sup>11</sup> Wendy Moyle<sup>12,13</sup>

1. School of Physiotherapy and Exercise Science, Curtin University, Perth, Australia
2. School of Nursing, Midwifery and Paramedicine, Curtin University, Perth, Australia
3. School of Public Health, Curtin University, Perth, Australia
4. Discipline of School of Nursing, College of Science, Health Engineering and Education, Murdoch University, Murdoch, Australia
5. Melbourne School of Psychological Sciences, University of Melbourne, Melbourne, Australia
6. Rehabilitation Ageing and Independent Living (RAIL) Research Centre, Monash University, Melbourne, Australia
7. Armadale Health Service, Armadale, Australia
8. School of Psychology and Public Health, La Trobe University, Melbourne, Australia
9. Perron Institute for Neurological and Translational Science, Perth, Australia
10. Department of General Medicine, Sir Charles Gairdner Hospital, Nedlands, Australia
11. Gold Coast Hospital and Health Services, Gold Coast, Australia
12. Menzies Health Institute Queensland, Griffith University, Brisbane, Australia

- 1  
2  
3 13. School of Nursing and Midwifery Nathan and Gold Coast, Griffith University, Brisbane,  
4  
5 Australia  
6  
7  
8 14. Department of Rehabilitation and Aged Care, Sir Charles Gairdner Osborne Park Health  
9  
10 Care Group, Nedlands, Australia  
11  
12 15. Faculty of Health Sciences & Medicine, Bond University, Gold Coast, Australia  
13  
14 16. Medical Division, Sir Charles Gairdner Osborne Park Health Care Group, Nedlands,  
15  
16 Australia  
17  
18 17. Institute for Health Research, The University of Notre Dame, Fremantle, Australia  
19  
20  
21  
22  
23  
24

25 **Corresponding author**

26 Professor Anne-Marie Hill

27 Curtin University, School of Physiotherapy and Exercise Science

28 Kent Street,

29 Bentley

30 Western Australia

31 Phone: +61892664104

32 Email: [Anne-Marie.Hill@curtin.edu.au](mailto:Anne-Marie.Hill@curtin.edu.au)

33 ORCID ID – <https://orcid.org/0000-0003-1411-6752>

34  
35  
36  
37  
38  
39  
40  
41  
42  
43  
44  
45  
46  
47  
48 **Word count 3872**  
49  
50  
51  
52  
53  
54  
55  
56  
57  
58  
59  
60

## ABSTRACT

### Introduction

There are personal and societal benefits from caregiving; however caregiving can jeopardise caregivers' health. The Further Enabling Care at Home (FECH+) program provides structured nurse support, through telephone outreach, to caregivers of older adults following discharge from acute hospital care to home. The trial aims to evaluate the effectiveness of the FECH+ program on caregivers' health-related quality of life (HRQOL) after care recipients' hospital discharge.

### Methods and analysis

A multi-site, parallel-group, randomised controlled trial with blinded baseline and outcome assessment and intention-to-treat analysis, adhering to CONSORT guidelines will be conducted. Participants (N=925 dyads) comprising informal home caregiver (18 years or older) and care recipient (70 years or older) will be recruited when the care recipient is discharged from hospital. Caregivers of patients discharged from wards in three hospitals in Australia (one in Western Australia, two in Queensland) are eligible for inclusion.

Participants will be randomly assigned to one of two groups. The intervention group receive the FECH+ program, which provides structured support and problem solving for the caregiver after the care recipient's discharge, in addition to usual care. The control group receives usual care. The program is delivered by a registered nurse and comprises six 30 to 45-minute telephone sessions over six months. The primary outcome is caregivers' HRQOL measured using the AQOL-8D. Secondary outcomes include caregiver preparedness, strain and distress, and use of health care services. Changes in HRQOL between groups will be

1  
2  
3 compared using a mixed regression model that accounts for the correlation between repeated  
4  
5 measurements.  
6  
7

### 8 9 **Ethics and dissemination**

10  
11  
12 Participants will provide written informed consent. Ethics approvals have been obtained from  
13  
14 Sir Charles Gairdner and Osborne Park Health Care Group, Curtin University, Griffith  
15  
16 University, Gold Coast Health Service, and government health data linkage services.  
17  
18 Findings will be disseminated through presentations, peer-reviewed journals and conferences.  
19  
20  
21  
22  
23  
24

### 25 **Trial Registration number**

26  
27 Australian New Zealand Clinical Trials Registry, ACTRN12620000060943  
28  
29  
30  
31

### 32 **Keywords**

33  
34 Patient discharge, caregivers, randomised controlled trial, dyad, aged, aged 80 and over,  
35  
36 telephone-based intervention  
37  
38  
39  
40  
41  
42  
43  
44  
45  
46  
47  
48  
49  
50  
51  
52  
53  
54  
55  
56  
57  
58  
59  
60



### Strengths and limitations of this study

- The study uses a multi-centre randomised design with blinded baseline and outcome assessment.
- Follow-up time points of six and 12 months allow robust evaluation of the effect of the FECH+ program on caregivers' outcomes as well as the use of health services.
- Evaluating secondary outcomes, including caregiver distress and preparedness to care will provide further insight into the intervention effect.
- Participants cannot be blinded to receiving the intervention.
- The study population is older and frail, therefore mortality and hospital readmission may affect the recruitment or retention of participants.

## INTRODUCTION

In Australia, an estimated 2.65 million people provide informal care, 32% as primary caregivers, of whom over 60% provide support for a spouse or parent.[1] The proportion of older adults (aged 65 years and over) across the world is expected to double from 12% in 2020 to 22% by 2050[2] and in Australia older people expect to continue to live at home, with less than 5% of older people living in Residential Aged Care (RAC) accommodation.[1] Hence informal caregivers are critical in supporting older people to live at home for as long as possible.[3]

Caregivers, however, report significant personal costs associated with care, including serious financial, social and health problems.[4,5] Caregivers repeatedly report lower levels of wellbeing than the general population.[5] Mental health risks are particularly severe, with caregivers reporting significantly higher levels of loneliness, anxiety, depression and stress than the general population.[4-7] A systematic review found evidence of a negative impact of caregiving on both the mental and physical health of the informal caregiver.[8] Rising levels of caregiver stress are known to predict premature admission of the care recipient to RAC.[9]

There is evidence that providing supportive programs can reduce the adverse consequences of caregiving for older adults.[10-13] However, one in five caregivers in the UK report receiving no support.[4] Ensuring that resources and services are used by those who need them is problematic, with identified barriers including cost, having no one to talk to, not knowing what is available and caring responsibilities taking priority.[4,5] Older adults discharged from hospital are at high risk of functional decline, unplanned hospital readmissions and injurious falls.[14-16] This transition can be particularly problematic for older adults who receive care support and their caregivers. Lack of continuity of care and

1  
2  
3 inadequate communication and discharge plans during this time of transition can increase  
4 caregiver burden even further.[17-19]  
5  
6  
7  
8  
9

10 There is limited evidence about how to effectively support caregivers of older adults when  
11 they are discharged from hospital, including what interventions can sustain and improve  
12 caregivers' health and wellbeing.[19-21] A recent meta-analysis of 23 trials found low  
13 quality evidence that informal caregiver interventions provided after hospital discharge may  
14 reduce caregiver burden and anxiety in stroke populations. However, they did not change  
15 health related quality of life (HRQOL), anxiety, or health resource use.[20] Over 90% of the  
16 included trials were conducted in stroke populations thereby providing limited  
17 generalisability. Another systematic review of 21 trials found that telephone interventions  
18 providing support for caregivers may slightly reduce anxiety and improve preparedness to  
19 care, but did not significantly improve other caregiver outcomes.[21] None of the included  
20 trials in the review measured changes in HRQOL.[21] Both reviews recommended further  
21 high-quality trials in caregiver populations.  
22  
23  
24  
25  
26  
27  
28  
29  
30  
31  
32  
33  
34  
35  
36  
37  
38  
39

40 We conducted an RCT evaluating the Further Enabling Care at Home (FECH) program,  
41 delivered to caregivers when the frail, older adult they cared for was discharged from  
42 hospital.[11] The program significantly reduced caregiver strain and distress and increased  
43 preparedness to care.[11] Caregivers also reported high levels of satisfaction with the  
44 program.[22] The FECH program had some limitations. We limited caregiver support to  
45 receiving three telephone contacts over three weeks after discharge and did not take an  
46 approach that assisted caregivers to develop and implement problem-solving skills. The trial  
47 was conducted in a single hospital ward and 141 dyads provided data at all timepoints.  
48  
49 Therefore we aim to increase the duration and intensity of the program (FECH+) and conduct  
50  
51  
52  
53  
54  
55  
56  
57  
58  
59  
60

1  
2  
3 a multi-centre RCT to evaluate whether the FECH+ program may improve caregivers'  
4  
5 HRQOL. Since the original FECH program improved caregiving preparedness, we also seek  
6  
7 to examine if the FECH+ program results in improvements in care, and therefore in care  
8  
9 recipients' levels of independence and symptoms of distress.  
10  
11  
12  
13

### 14 **Aims and hypotheses**

15  
16  
17 The primary aim of the trial is to evaluate the efficacy of participation in the FECH+ program  
18  
19 in addition to usual discharge care on HRQOL of caregivers of older adults discharged home  
20  
21 from hospital, compared to receiving usual discharge care alone. The secondary aims are to  
22  
23 evaluate the efficacy of participation in the FECH+ program in addition to usual discharge  
24  
25 care on: i) caregiver preparedness to care, self-efficacy and levels of strain and distress; ii)  
26  
27 care recipient outcomes of symptoms of distress and level of independence, compared to  
28  
29 usual discharge care alone.  
30  
31  
32  
33  
34

35  
36 The primary hypothesis is that caregivers participating in the FECH+ program in addition to  
37  
38 receiving usual hospital discharge care (intervention group) when compared with caregivers  
39  
40 receiving usual discharge care alone (control group), will report improved HRQOL.  
41

42  
43 Secondary hypotheses are that the: i) intervention group will report improved caregiving  
44  
45 preparedness, decreased strain and distress, and improved self-efficacy compared to the  
46  
47 control group; and ii) care recipients in the intervention group will experience decreased  
48  
49 symptom distress and improved independence compared to the control group.  
50  
51  
52  
53

54  
55 A separate process evaluation will be conducted to explore how caregiving is impacted by  
56  
57 participating in the FECH+ program and identify aspects of implementation that particularly  
58  
59  
60

1  
2  
3 contribute to effectiveness. A subsequent trial-based economic evaluation will evaluate the  
4  
5 effectiveness of the intervention using the framework of a within-trial, cost-utility analysis.  
6  
7  
8  
9  
10  
11  
12  
13  
14  
15  
16  
17  
18  
19  
20  
21  
22  
23  
24  
25  
26  
27  
28  
29  
30  
31  
32  
33  
34  
35  
36  
37  
38  
39  
40  
41  
42  
43  
44  
45  
46  
47  
48  
49  
50  
51  
52  
53  
54  
55  
56  
57  
58  
59  
60

For peer review only

## METHODS AND ANALYSIS

### Design

The trial is a multi-centre parallel two-group RCT with 1:1 dyad allocation to the intervention (FECH+ program in addition to usual care) group or the control (usual care alone) group. The study will adhere to the Consolidated Standards of Reporting Trials (CONSORT) guidelines (see **Figure 1**).<sup>[23]</sup> This protocol is reported in accordance with the Standard Protocol Items: Recommendations for Interventional Trials (SPIRIT) 2013 Statement (see **Additional file 1**).<sup>[24]</sup> The trial is registered through the Australian New Zealand Clinical Trials Registry (ACTRN12620000060943).

### Participants

Participants will be enrolled as dyads (caregiver and care recipient). To be eligible for the study caregivers must be: a) aged 18 years or older; b) providing unpaid support as a caregiver to a patient (care recipient) aged 70 years or older when this care recipient is discharged home from a ward included in the study; care recipients must be: c) discharged home from a ward included in the study. Exclusion criteria are that care recipients are discharged to a setting other than home (such as to a nursing home or another hospital) or undertake a hospital in the home program. Based on a definition of a caregiver used in an Australian study investigating the support of frail older people,<sup>[25]</sup> caregivers are defined as family members or friends providing unpaid care and support to older people. The support must be regular (at least weekly) ongoing, home-based and can be physical and/or emotional care.

### Setting

1  
2  
3 The trial will be conducted at three public hospitals in Australia. In Western Australia (WA),  
4 the site is Sir Charles Gairdner Hospital, a metropolitan tertiary hospital with approximately  
5 600 beds. In Queensland (QLD), the two hospitals are Robina Hospital (approximately 400  
6 beds) and Gold Coast University Hospital (approximately 600 beds). Wards included in the  
7 trial admit medical patients, of whom large numbers are aged over 70 years.  
8  
9  
10  
11  
12  
13  
14  
15  
16

### 17 **Randomisation and Blinding**

18  
19 The WA Health Translation Network's Clinical Trials and Data Management Centre  
20 (CTDMC) will administer the randomisation process. The allocation list has been generated  
21 prior to trial commencement by the CTDMC using computer-generated random numbers and  
22 organised such that recruitment to the two study arms (WA and QLD) occurs at an  
23 approximately equal rate. The treatment allocation list is stored as a password protected file  
24 at Curtin University and is only accessible to the trial's CTDMC administrators. The research  
25 assistants (RAs) enter all baseline data directly into a secure online database. Completion of  
26 baseline data entry automatically triggers the allocation of the dyad (caregiver and care  
27 recipient) to the next number in the sequence and triggers an alert to the project manager,  
28 who contacts the FECH+ nurse if the dyad is allocated to the intervention group.  
29  
30  
31  
32  
33  
34  
35  
36  
37  
38  
39  
40  
41  
42  
43  
44

45 The investigators on the trial team are not involved in recruitment or data collection and all  
46 investigators, including the statistical team, are blinded to group allocation until after  
47 analyses are completed. RAs who enrol patients and conduct baseline and outcome  
48 assessments are blinded to group allocation throughout the study. The project manager is the  
49 only team member to see the group allocation as she manages the trial procedure. The nurses  
50 who deliver the intervention know which participants receive the intervention, but are not  
51 involved in baseline or outcome data collection. Hospital staff who organise discharge  
52  
53  
54  
55  
56  
57  
58  
59  
60

1  
2  
3 services remain blinded to participants' enrolment into the study. Participants are not  
4  
5 specifically informed of their group allocation but cannot be blinded to the intervention they  
6  
7 receive. Participants will be instructed at enrolment and during monthly phone calls not to  
8  
9 divulge their allocation to research staff. RAs who conduct baseline and outcome assessments  
10  
11 are based in the hospitals while the nurses who deliver the intervention are located at the  
12  
13 Universities, to maintain blinding of staff.  
14  
15  
16  
17  
18

### 19 **Intervention**

20  
21 Participants allocated to the intervention receive the FECH+ program in addition to usual  
22  
23 care. A summary of the FECH+ program is presented in **Table 1** using the Template for  
24  
25 Intervention Description and Replication (TIDieR) checklist.[26] The FECH+ program is a  
26  
27 telephone-based, post-hospital-discharge intervention delivered to the caregiver by one or  
28  
29 more specially trained 'FECH+' nurses. These registered nurses have acute gerontological  
30  
31 nursing care experience, have substantial knowledge on how to navigate the home care  
32  
33 system, and receive training in the FECH+ intervention.  
34  
35  
36  
37  
38  
39  
40  
41  
42  
43  
44  
45  
46  
47  
48  
49  
50  
51  
52  
53  
54  
55  
56  
57  
58  
59  
60



**Table 1.** Summary of the FECH+ program (TIDieR checklist).

|                     |                                                                                                                                                                                                                                                                                                                                                                                                                                                                                                                                                                                                                                              |
|---------------------|----------------------------------------------------------------------------------------------------------------------------------------------------------------------------------------------------------------------------------------------------------------------------------------------------------------------------------------------------------------------------------------------------------------------------------------------------------------------------------------------------------------------------------------------------------------------------------------------------------------------------------------------|
| 1. Brief name       | Further Enabling Care at Home (FECH+) for informal caregivers of older adults discharged home from hospital.                                                                                                                                                                                                                                                                                                                                                                                                                                                                                                                                 |
| 2. Why              | The FECH+ program offers a problem-solving, caregiver-focussed approach to improve outcomes for the caregiver and care recipient that is complementary to usual discharge care. It is designed to provide caregivers with timely health professional support and training to use the resources available in the community. It aims to develop problem-solving skills and address the caregiver's identified needs.                                                                                                                                                                                                                           |
| 3. What- materials  | The caregiver completes the CSNAT[27] with support provided by the FECH+ nurse. A standard operating procedures manual is used by the nurse delivering the intervention. Resources relevant for individual caregivers, such as contacts for organisations, are emailed or mailed to participants as required. Caregivers are provided with an initial booklet and an individualised summary sheet after the final phone call.                                                                                                                                                                                                                |
| 4. What- procedures | The FECH+ nurse facilitates caregivers to (a) reflect upon the current caregiving situation, (b) identify and prioritise new or ongoing support needs, and (c) implement a problem-solving approach to address these support needs. Caregivers are guided to address three prioritised needs using problem-solving techniques and goal setting. The first phone call explores the caregiver's understanding of discharge information. During subsequent phone calls caring responsibilities are discussed, using the CSNAT[27] to identify problems. The program aims to facilitate the development of caregivers' problem-solving skills to |

- 1  
2  
3 continue without support from the FECH+ nurse after the intervention  
4  
5 is completed. Each contact point provides an opportunity to reinforce  
6  
7 the problem-solving skills learnt.  
8  
9
- 10 5. Who provided Registered nurses experienced in gerontological nursing and who have  
11  
12 received training in delivering the FECH+ program.  
13  
14
- 15 6. How The FECH+ program is delivered via telephone to the caregiver after  
16  
17 the care recipient is discharged from hospital.  
18
- 19 7. Where Delivered directly to the caregiver in their home.  
20
- 21 8. When and how Six telephone calls by the FECH+ nurse after the care recipient's  
22  
23 much discharge from hospital. *Call 1*) during the first week after discharge  
24  
25 (15 minutes); *Call 2*) at two weeks after discharge (approximately 45  
26  
27 minutes); *Calls 3 to 6*) at 1, 2, 4, and 6 months respectively after  
28  
29 discharge, (each approximately 30 minutes).  
30  
31
- 32 9. Tailoring The intervention is tailored to the needs of each caregiver, using a  
33  
34 problem-solving approach to identify, prioritise, and address the top  
35  
36 three support needs. Individual resources are provided to participants  
37  
38 according to problems or needs identified.  
39  
40
- 41 10. Modifications to be reported at study conclusion  
42
- 43 11. Fidelity to be reported at study conclusion  
44
- 45 12. Adherence to be reported at study conclusion  
46  
47  
48

---

49 *Notes:* CSNAT = Carer Support Needs Assessment Tool  
50  
51  
52  
53  
54  
55  
56  
57  
58  
59  
60

---

1  
2  
3  
4  
5 The original FECH program[11] has been expanded (FECH+) to encourage and build the  
6 caregiver's use of problem-solving skills, through instruction and role modelling, that they  
7  
8 can continue to use after the intervention period. Problem-solving is a practical step-by-step  
9  
10 approach typically involving identifying and defining the problem, understanding it, setting  
11  
12 goals and generating solutions, implementing a course of action, and evaluating its  
13  
14  
15 efficacy.[28]  
16  
17  
18  
19  
20  
21

## 22 Training

23  
24 The FECH+ nurses undertake three days face to face training. This includes how to assess the  
25  
26 caregiver's understanding of discharge information, how to use the Caregiver Support Needs  
27  
28 Assessment Tool (CSNAT)[27] to facilitate the caregivers' identifying and prioritising  
29  
30 support needs, and assisting the caregiver to undertake a problem-solving approach. The  
31  
32 CSNAT has 14 items with Likert-type response options that rate needs for support in two  
33  
34 domains: enabling the caregiver to care for the care recipient at home and enabling support  
35  
36 for the caregiver in their caring role.[27] Training materials include the resources associated  
37  
38 with the online CSNAT toolkit[29] and an electronic manual that provides information for  
39  
40 caregivers related to care provision for older people in Australia, as well as a manual tailored  
41  
42 for each state that outlines the problem-solving approach.[22]  
43  
44  
45  
46  
47  
48

## 49 Usual Care

50  
51 All participants in both intervention and control groups will receive usual discharge care.  
52  
53 Usual discharge care includes providing the care recipient and/or caregiver with a copy of the  
54  
55 discharge letter, medications or prescriptions, outpatient appointments and home care  
56  
57  
58  
59  
60

1  
2  
3 programs organised by the hospital team. Social work input for caregivers is not routine but  
4  
5 may occur when prioritised by the ward social worker during admission.  
6  
7  
8  
9

## 10 **Outcome Measures**

11  
12 The primary outcome is caregivers' HRQOL at six months after hospital discharge measured  
13  
14 using the 35-item Assessment of Quality of Life – 8 dimensions (AQoL-8D).[30,31] It has  
15  
16 established validity and reliability, and good psychometric properties which capture psycho-  
17  
18 social as well as physical health domains.[31] Australian norms have been established for the  
19  
20 AQoL-8D.[32]  
21  
22

23  
24  
25  
26 Secondary outcomes are:

27  
28 1. Caregivers' HRQOL at 12 months after hospital discharge measured using the 35-  
29  
30 item AQoL-8D.[30,31]  
31  
32

33 Other secondary outcomes evaluated at six and 12 months after hospital discharge include:

34  
35 2. Caregivers' self-rated preparedness for caregiving, measured using the Preparedness  
36  
37 for Caregiving Scale (PCS).[33] This 8-item scale has five response options (0=not at all  
38  
39 prepared, 4=very well prepared) and is designed for use with caregivers of older adults  
40  
41 receiving homecare/experiencing care transitions. The construct validity for the PCS has been  
42  
43 established in older adults.[34] Testing in patients with life-threatening illness confirmed  
44  
45 satisfactory internal consistency, reliability and stability, and unidimensionality.[35]  
46  
47

48  
49 3. Caregivers' self-efficacy measured with the 21-item Caregiver Inventory (CGI).[36]

50  
51 This questionnaire has four sub-scales confirmed by factor analysis: Cronbach's alpha for the  
52  
53 scale was 0.91 in a sample of caregivers of patients for whom the main diagnoses were  
54  
55 cancer, chronic obstructive pulmonary disease, stroke, chronic heart failure, and dementia.  
56  
57

58 Responses are provided using a five-point Likert scale.  
59  
60

- 1  
2  
3 4. Caregivers' strain and distress measured by the corresponding sub-scales of the  
4 Family Appraisal of Caregiving Questionnaire- Palliative Care (FACQ), for which good  
5 internal consistency, reliability and construct validity are confirmed.[37] Responses are  
6 provided using a five point Likert scale.  
7  
8  
9  
10  
11  
12 5. Care recipients' level of independence reported by caregivers using the Barthel  
13 Activities of Daily Living Index (BADLI), which has established reliability and validity,  
14 including for telephone administration.[38, 39]  
15  
16  
17  
18  
19 6. Care recipients' symptoms measured using the Symptom Assessment Scale  
20 (SAS).[40] Seven symptoms are each scored from 0 (not at all) to 10 (worst possible). Scores  
21 can be totalled, and caregiver proxies can complete responses. Adequate internal consistency  
22 reliability and test-retest reliability and concurrent validity have been demonstrated in older  
23 populations.[40, 41]  
24  
25  
26  
27  
28  
29  
30  
31  
32  
33 Demographic data collected for caregivers and care recipients at baseline are age, gender,  
34 country of birth, number of prescription medications taken by caregiver and care recipient's  
35 length of stay in hospital. Information about the type, duration, and amount of care provided  
36 by the caregiver, types of services received by the caregiver/care recipient and caregiver/care  
37 recipient health (number, type of health conditions) will also be collected.  
38  
39  
40  
41  
42  
43  
44  
45  
46

## 47 Procedure

48  
49 The study procedure is summarised in **Table 2**. Participant dyads will be enrolled in the trial  
50 by the RAs within 24 hours of discharge from hospital. Baseline (timepoint 1) assessment,  
51 including demographic data collection, is completed during the first week after hospital  
52 discharge. Questionnaires are administered by phone by the RAs. Data collection at  
53 timepoints 2, 3, and 4 will be prompted by the project manager sending an alert to the RAs  
54  
55  
56  
57  
58  
59  
60

through the database and completed by phone for both intervention and control groups. This strategy ensures that FECH+ program completion occurs prior to timepoint 3 data collection and maintains the RAs blinding to group allocation.

**Table 2. Overview of procedure**

| Timepoint                                                                                                                                                                                                                                                                                               | Time After Discharge | Measurement tools administered                                      |
|---------------------------------------------------------------------------------------------------------------------------------------------------------------------------------------------------------------------------------------------------------------------------------------------------------|----------------------|---------------------------------------------------------------------|
| T1 (baseline) data collection                                                                                                                                                                                                                                                                           | 1-4 days             | AQoL-8D*, CGI, PCS, FACQ, SAS, BADLI, Demographic data              |
| <b><i>Intervention group only: FECH+ Nurse Contacts 1-4: one week, two weeks, 1 month, 2 months after discharge</i></b>                                                                                                                                                                                 |                      |                                                                     |
| T2 data collection                                                                                                                                                                                                                                                                                      | 3 months             | AQoL-8D, PCS, FACQ, SAS, BADLI                                      |
| <b><i>Intervention group only: FECH+ Nurse Contacts 5-6: 4months, 6 months after discharge</i></b>                                                                                                                                                                                                      |                      |                                                                     |
| T3 data collection                                                                                                                                                                                                                                                                                      | 6 months             | AQoL-8D, CGI, PCS, FACQ, SAS, BADLI, Qualitative Interview (subset) |
| T4 data collection                                                                                                                                                                                                                                                                                      | 12 months            | AQoL-8D, CGI, PCS, FACQ, SAS, BADLI, Qualitative Interview (subset) |
| <p><i>Notes:</i> CGI= Caregiver Inventory, PCS= Preparedness for Caregiving Scale, FACQ= Family Appraisal of Caregiving Questionnaire- Palliative Care, SAS= Symptom Assessment Scale, BADLI= Barthel Activities of Daily Living Index</p> <p>*AQoL-8D measures health-related quality of life [30]</p> |                      |                                                                     |

### Statistical analysis plan

Characteristics of the groups will be summarised using descriptive statistics (frequencies and percentages for categorical variables; means, standard deviations, medians and ranges for variables measured on a continuous scale). Differences in demographic and baseline health status variables between groups at baseline will be compared using Chi-square, t-tests or non-parametric Wilcoxon two-sample tests as appropriate. Changes from baseline in the AQoL-8D score for the caregiver will be calculated to each time point and tested for normality using the Shapiro-Wilk statistic; if not normally distributed, a Box-Cox transformation will be applied to the measure before further analysis. Comparison of the changes in AQoL-8D scores between control and intervention groups will be performed using a mixed regression model with the caregiver group identified as a random effect. This model takes into account the correlation between repeated measurements on each individual. An interaction term between time and group will be introduced into the model to test whether rates of change in the outcome differ between groups. If differences between the groups are evident at baseline, these will be included in the model as covariates so that adjustment can be made before examining differences between groups in outcomes.

In our preliminary work,[11] there was <20% missing data. Missing data will be managed using multiple imputation methods informed by a sensitivity analysis to manage this, creating 25 or more data sets. Two analyses will be performed, namely: an analysis using only the observed data, and secondly, after missing value substitution, where necessary. Data will be analysed using an intention-to-treat approach. Secondary outcomes will be analysed in a similar manner to the primary outcome. Statistical analyses will be conducted using STATA 16 software (Stata Statistical Software, College Station, TX: StataCorp LLC)) and a p-value <0.05 will be taken to indicate statistical significance.

## Sample size

The primary outcome is the change in total score on the AQoL-8D[30] for the caregiver at 6 months post-discharge. A very small effect size of 0.06 has been described as being of clinical importance.[42] However, we anticipate a larger effect size, based upon: a) our assessment of changes in health, measured using the SF12 [43] during our preliminary study,[11] in which we obtained a positive change in physical health (0.17) and mental health (0.22) from baseline until immediately post-intervention; b) that the AQoL-8D is a more appropriate outcome measure as psychosocial components of health are emphasised more; and c) that we are now implementing an expanded intervention with longer follow up. Therefore, we designed this study with 80% power to detect an effect size of 0.22. This would require 648 caregiver dyads (324 in each of the control and intervention groups), determined using the G\*Power sample size calculator.[44] We anticipate 30% attrition during the 12-month post-discharge period so our recruitment target to address the primary outcome variable is 925 dyads. Based upon preliminary work, this sample size will also allow 80% power to detect meaningful differences in the secondary outcomes for caregiver preparedness, strain and distress, and hospitalisation costs for patients.[11]

## Process evaluation

A process evaluation will assist in understanding the mechanism of the trial results. The process evaluation uses the framework recommended by the Medical Research Council for evaluating complex interventions.[45] Caregivers' and nurses' feedback on aspects of program implementation will be evaluated. A purposive sample (estimated 25-40) of caregivers from WA and QLD who have completed participation in the FECH+ program will be selected immediately after program conclusion for inclusion in qualitative interviews.



1  
2  
3 Sample selection will ensure maximum variation (e.g., gender, age, relationship, caregiving  
4 duration), until data saturation.[46] Qualitative, digital, audio-recorded and transcribed semi-  
5 structured telephone interviews (estimated 10-20 minutes) will be scheduled at two time  
6 points (at the end of the intervention and six months later) to explore how the FECH+  
7 program has influenced caregiving and caregiver experiences during and after the program.  
8 FECH+ nurses will also be asked to record their reflections on each FECH+ Program contact.  
9 This includes identifying barriers to, or facilitators of, the effectiveness of the FECH+  
10 program.  
11  
12  
13  
14  
15  
16  
17  
18  
19  
20  
21

22  
23  
24 Program implementation will be examined by addressing fidelity, safety, adaptations, reach,  
25 and dose.[45] Data to be collected by the FECH+ nurses as they deliver the intervention  
26 include:  
27  
28  
29

- 30 a) adherence to or deviation from planned FECH+ processes including any safety concerns and  
31 how addressed;  
32  
33 b) information provided to caregivers and the extent to which caregivers engaged with  
34 resources provided;  
35  
36 c) time taken to implement processes, including duration and frequency of sessions.  
37  
38  
39  
40  
41  
42  
43

44 Qualitative data will be analysed using thematic analysis.[46] Strategies to enhance the  
45 trustworthiness of findings will include verbatim transcriptions of audio-recorded interviews  
46 and an audit trail.[46] Quantitative data will be presented using the framework of the process  
47 evaluation and where appropriate triangulated with qualitative data to assist in clarifying  
48 complex causal pathways.[45]  
49  
50  
51  
52  
53  
54  
55  
56  
57

## 58 **Economic analysis**

59  
60

1  
2  
3 The economic analysis plan will be published separately. Briefly, cost effectiveness of the  
4 intervention will be measured using a within-trial cost-utility analysis evaluating the mean  
5 incremental cost and quality-adjusted life years (QALYs) according to intervention status. A  
6  
7  
8  
9  
10 12-month time horizon will be used, taking a health system perspective.  
11  
12  
13

### 14 **Data Management**

15  
16  
17 Data management will be overseen by a data management committee comprising a  
18 representative from the CTDMC, the WA and Qld State Managers and trial leaders from WA  
19 (AMH) and QLD (WM). The committee will undertake regular monthly monitoring and  
20 auditing of data entry procedures and guide all data management. Data security is primarily  
21 addressed by the use of REDCap, an online application that provides for secure data entry,  
22 storage, and transfer. (<https://www.project-redcap.org/>) The CTDMC administers REDCap  
23 and all data are stored in WA. Administrative data (which include names and dates of birth)  
24 that are accessed via the database for merging with the health data will be locked down prior  
25 to creating a merged dataset and are only accessible to a CTDMC administrator. De-  
26 identified datasets will be uploaded through the University's encrypted system and stored on  
27 a password protected drive (at Curtin University). All data will be securely managed and  
28 stored at Curtin University as per National Health and Medical Research Council Australia  
29 guidelines, State data linkage services and Services Australia guidelines. Following the  
30 completion of the study analyses, a de-identified dataset will be made available on reasonable  
31 request after ongoing secondary analyses are conducted and pending ethics approval from  
32 existing and requesting institutions and approval from all investigators.  
33  
34  
35  
36  
37  
38  
39  
40  
41  
42  
43  
44  
45  
46  
47  
48  
49  
50  
51  
52  
53  
54  
55

### 56 **Trial Status**

1  
2  
3 Recruitment commenced in August 2020 and is expected to be completed by approximately  
4  
5 April 2022 with final follow up occurring in April 2023. Primary data analyses will be  
6  
7 completed, followed by the process evaluation. Final health data linkage will be undertaken  
8  
9 in the 12 months after final follow up. Health economic analyses will then be completed.  
10  
11  
12  
13

### 14 **Trial Management**

15  
16 Any amendments required to the study will be agreed on by the trial management committee  
17  
18 consisting of all Chief Investigators (AMH, WM, RM, KH, NW, SS, CB, SA), and submitted  
19  
20 to all ethics committees for approval prior to being commenced. The trial management  
21  
22 committee will monitor the trial in accordance with the currently approved protocol, which  
23  
24 includes submitting annual ethics reports detailing trial progress and any adverse events to all  
25  
26 ethics committees. Each of the named investigators on the grant shall be eligible to have  
27  
28 authorship.  
29  
30  
31  
32  
33  
34

### 35 **Patient and Public Involvement**

36  
37 Two consumer advocates are members of the trial team. This study was developed with  
38  
39 caregiver input from Carers WA and the WA Consumer and Community Health Research  
40  
41 Network, prior to submitting the application for funding. The consumer input assisted to  
42  
43 ensure the appropriateness of the intervention and study processes. This included assisting  
44  
45 with wording of documents for the trial and aspects of procedure and intervention delivery.  
46  
47 The two consumer advocates are ongoing members of the trial team and continue to inform  
48  
49 and give feedback about the study procedure. Both consumer organisations will contribute to  
50  
51 the dissemination of results and future presentations and translation projects.  
52  
53  
54  
55  
56  
57  
58  
59  
60

## ETHICS AND DISSEMINATION

The study has been approved by hospitals (the Sir Charles Gairdner Osborne Park Health Care Group, Gold Coast Health Care Group) and universities (Curtin and Griffith) human research ethics committees. Approvals for linked health data for economic evaluation have been obtained from the Data Linkage Branches of WA Health, QLD Health, and Services Australia (for national health administered data). All caregivers will provide written, informed consent to participate in the trial. Care recipients will also provide written, informed consent to participate in the trial. Cognitive impairment may occur in a care recipient who forms part of the dyad. A waiver of consent has been approved in WA for these care recipients to be included in the study. If these care recipients are encountered in QLD, we will seek consent from the appropriate substitute decision-maker.

To disseminate findings, Carers WA and Carers QLD, (two peak organisations who provide carer advocacy and support) will be asked to publicise the study completion and findings on their website. Our consumer advocates will provide advice and assistance to maximise engagement strategies through established state and national consumer networks. Papers will be published in peer-reviewed journals, and abstracts submitted to relevant conferences. Practitioner and consumer forums will be held in participating hospitals and State health districts. Study participants will be provided with a summary of study findings upon request.

## ACKNOWLEDGEMENTS

Authors thank and acknowledge the contributions of Adjunct Associate Professor Christine Toye (Curtin University) who led the trial of the original FECH program, made a substantial contribution to the trial design, led the grant application to obtain the funding for the trial and completed ethics applications, and Dr Richard Parsons who contributed to the trial design, grant application and preparation of the statistical analysis plan.

## COMPETING INTERESTS

The authors have no conflicts to declare.

## AUTHORS CONTRIBUTION

AMH and WM led manuscript drafting. AMH is the lead investigator on the National Health and Medical Research Council of Australia grant and all authors are named applicants on the grant. AMH, WM, RM, KH, SS, CB, NW and SA contributed to trial design and will assist with monitoring trial procedure. AMH leads the trial with support from WM, LG and AK. CB, SS, SA, KH, LG, WM and AMH contribute to intervention design and delivery. MB and AMH lead the statistical analysis plan. AK and LG lead the management of the trial sites. MBr, CR, SM, (WA) TC and CJ (QLD) contribute to trial procedure, including management at the sites. RM leads the economic analyses. All authors provided critical evaluation and approval of the final submitted manuscript.

## FUNDING

This work is supported by a grant awarded by the National Health and Medical Research Council Australia (grant number APP1157834). Additional funding to support the research

1  
2  
3 has been provided by Curtin University. The funders have no role in the design of the study  
4  
5 and will not have any role in its execution, data management, analysis and interpretation, nor  
6  
7 the decision to submit results for publication. Anne-Marie Hill is supported by a National  
8  
9 Health and Medical Research Council (Australia) Career Development Award.  
10  
11  
12  
13  
14  
15  
16  
17  
18  
19  
20  
21  
22  
23  
24  
25  
26  
27  
28  
29  
30  
31  
32  
33  
34  
35  
36  
37  
38  
39  
40  
41  
42  
43  
44  
45  
46  
47  
48  
49  
50  
51  
52  
53  
54  
55  
56  
57  
58  
59  
60

For peer review only

**REFERENCES**

1. Australian Bureau of Statistics. Disability, ageing and carers, Australia: summary of findings, 2018. <https://www.abs.gov.au/ausstats/abs@.nsf/mf/4430.0>. Accessed August, 2020.
2. World Health Organisation. Ageing and health. <https://www.who.int/news-room/fact-sheets/detail/ageing-and-health> Accessed August, 2020
3. Ris I, Schnepf W, Mahrer, Imhof R. An integrative review on family caregivers' involvement in care of home-dwelling elderly. *Health Soc Care Community* 2019;27:e95-e111. doi:10.1111/hsc.12663
4. Carers UK. State of caring. A snapshot of unpaid care in the UK 2019. <https://www.carersuk.org/news-and-campaigns/state-of-caring-survey-2020>. Accessed August, 2020.
5. Carers NSW Australia. 40 Years of Carer Surveys (1976-2016). <http://www.carersnsw.org.au/research/survey> Accessed July, 2020.
6. Butterworth P, Pymont C, Rodgers B, et al. Factors that explain the poorer mental health of caregivers: Results from a community survey of older Australians. *Aust N Z J Psychiatry* 2010;44:616-24. doi:10.3109/00048671003620202
7. Litzelman K, Skinner H, Gangnon R, et al. The relationship among caregiving characteristics, caregiver strain, and health-related quality of life: Evidence from the Survey of the Health of Wisconsin. *Qual Life Res* 2015;24:1397-406. doi:10.1007/s11136-014-0874-6
8. Bom J, Bakx P, Schut F, van Doorslaer E. The impact of informal caregiving for older adults on the health of various types of caregivers: a systematic review. *Gerontologist*, 59(5); e629–e642; <https://doi.org/10.1093/geront/gny137>

- 1  
2  
3 9. Betini RSD, Hirdes JP, Lero DS, et al. A longitudinal study looking at and beyond care  
4 recipient health as a predictor of long term care home admission. *BMC Health Serv*  
5  
6 *Res*2017;17:709. doi:10.1186/s12913-017-2671-8  
7  
8
- 9  
10 10. Lopez-Hartmann ML, Wens J, Verhoeven V, et al. The effect of caregiver support  
11 interventions for informal caregivers of community-dwelling frail elderly: Systematic  
12 review. *Int J Integr Care*2012;12:e133. doi:10.5334/ijic.845  
13  
14
- 15 11. Toye C, Parsons R, Slatyer S, et al. Outcomes for family carers of a nurse-delivered  
16 hospital discharge intervention for older people (the Further Enabling Care at Home  
17 Program): Single blind randomised controlled trial. *Int J Nurs Stud*2016;64:32-41.  
18  
19 doi:10.1016/j.ijnurstu.2016.09.012  
20  
21
- 22 12. Petrovic M, Gaggioli A. Digital mental health tools for caregivers of older adults-a  
23 scoping review. *Front Public Health*2020;8:128. doi:10.3389/fpubh.2020.00128  
24  
25
- 26 13. De Maria M, Tagliabue S, Ausili D, et al. Perceived social support and health-related  
27 quality of life in older adults who have multiple chronic conditions and their caregivers: a  
28 dyadic analysis. *Soc Sci Med*2020;262:113193. Epub 2020 Jul 29.  
29  
30 doi:10.1016/j.socscimed.2020.113193  
31  
32
- 33 14. Hill AM, Etherton-Beer C, McPhail S, et al. (2019). Falls after hospital discharge: a  
34 randomised clinical trial of individualised multi-modal falls prevention education. *J*  
35 *Gerontol A Biol Sci Med Sci*2019;74:1511-1517. doi:10.1093/gerona/glz026  
36  
37
- 38 15. Gill TM, Gahbauer EA, Murphy TE, et al. Risk factors and precipitants of long-term  
39 disability in community mobility: a cohort study of older persons. *Ann Intern*  
40 *Med*2012;156:131-40. doi:10.1059/0003-4819-156-2-201201170-00009  
41  
42
- 43 16. Jencks SF, Williams MV, Coleman EA. Rehospitalizations among patients in the  
44 Medicare fee-for-service program. *NEJM*2009;360(14):1418-  
45  
46 28. doi:10.1056/NEJMsa0803563. doi:10.1056/NEJMsa0803563  
47  
48  
49  
50  
51  
52  
53  
54  
55  
56  
57  
58  
59  
60



- 1  
2  
3 17. Hestevik CH, Molin M, Debesay J, et al. Older patients' and their family caregivers'  
4 perceptions of food, meals and nutritional care in the transition between hospital and  
5  
6 home care: a qualitative study. *BMC Nutrit*2020;6:11. doi:10.1186/s40795-020-00335-w  
7  
8  
9
- 10 18. Greysen SR, Harrison JD, Kripalani S, et al. Understanding patient-centred readmission  
11 factors: a multi-site, mixed-methods study. *BMJ Qual Saf*2017;26:33-41.  
12  
13 doi:10.1136/bmjqs-2015-004570  
14  
15
- 16 19. Pritchard E, Cussen A, Delafosse V, et al. Interventions supporting caregiver readiness  
17 when caring for patients with dementia following discharge home: A mixed-methods  
18 systematic review. *Australas J Ageing*2020;doi:10.1111/ajag.12765.  
19  
20  
21  
22  
23  
24  
25  
26  
27  
28  
29  
30  
31  
32  
33  
34  
35  
36  
37  
38  
39  
40  
41  
42  
43  
44  
45  
46  
47  
48  
49  
50  
51  
52  
53  
54  
55  
56  
57  
58  
59  
60
20. Smith TO, Pearson M, Pfeiffer K, et al. Caregiver interventions for adults discharged  
from the hospital: systematic review and meta-analysis. *J Amer Geriatr  
Soc*2019;67:1960-9. doi:10.1111/jgs.16048
21. Corry M, Neenan K, Brabyn S, et al. Telephone interventions, delivered by healthcare  
professionals, for providing education and psychosocial support for informal caregivers  
of adults with diagnosed illnesses. *Cochrane Database Syst Rev*  
2019.doi:10.1002/14651858.CD012533.pub2
22. Aoun SM, Stegmann R, Slatyer S, et al. Hospital postdischarge intervention trialled with  
family caregivers of older people in Western Australia: potential translation into practice.  
*BMJ Open*2018;8:e022747. doi:10.1136/bmjopen-2018-022747
23. Moher D, Hopewell S, Schulz KF, Montori V, Gotzsche PC, Devereaux PJ, et al.  
CONSORT 2010 Explanation and elaboration: updated guidelines for reporting parallel  
group randomised trials. *J Clinical Epidemiol*;2010;63:e1-  
37.doi:10.1016/j.jclinepi.2010.03.004

- 1  
2  
3 24. Chan A-W, Tetzlaff JM, Altman DG, et al. SPIRIT 2013 Statement: Defining standard  
4  
5 protocol items for clinical trials. *Ann Intern Med*2013;158:200-7. doi:10.7326/0003-4819-  
6  
7 158-3-201302050-00583  
8  
9
- 10 25. Aggar C, Ronaldson S, Cameron ID. Self-esteem in carers of frail older people:  
11  
12 Resentment predicts anxiety and depression. *Aging Ment Health*2011;15:671-8.  
13  
14 doi:10.1080/13607863.2011.562176  
15  
16
- 17 26. Hoffmann TC, Glasziou PP, Boutron I, et al. Better reporting of interventions: Template  
18  
19 for intervention description and replication (TIDieR) checklist and guide.  
20  
21 *BMJ*2014;348:g1687. doi:10.1136/bmj.g1687  
22  
23
- 24 27. Ewing G, Austin L, Diffin J, et al. Developing a person-centered approach to carer  
25  
26 assessment and support. *Br J Community Nurs*2015;20:580-4.  
27  
28 doi:10.12968/bjcn.2015.20.12.580  
29  
30
- 31 28. Malouff JM, Thorsteinsson EB, Schutte NS. The efficacy of problem solving therapy in  
32  
33 reducing mental and physical health problems: a meta-analysis. *Clin Psychol*  
34  
35 *Rev*2007;27:46-57. doi:10.1016/j.cpr.2005.12.005  
36  
37
- 38 29. The Carer Support Needs Assessment: a toolkit for Practitioners. 2015. Carer Support  
39  
40 Needs Assessment Tool (CSNAT) <http://csnat.org/> Accessed August 2020.  
41  
42
- 43 30. Richardson J, Iezzi A, Khan MA. Validity and reliability of the Assessment of Quality of  
44  
45 Life (AQoL-8D) multi-attribute utility instrument. *Patient*2014;7:85-96.  
46  
47 doi:10.1007/s40271-013-0036-x  
48
- 49 31. Richardson J, Khan MA, Iezzi A, et al. Comparing and explaining differences in the  
50  
51 magnitude, content, and sensitivity of utilities predicted by the EQ-5D, SF-6D, HUI 3,  
52  
53 15D, QWB, and AQoL-8D multi-attribute utility instruments. *Med Decis*  
54  
55 *Making*2014;35:276-91. doi:10.1177/0272989x14543107  
56  
57  
58  
59  
60

- 1  
2  
3 32. Maxwell A, Ozmen M, Iezzi A, et al. Deriving population norms for the AQoL-6D and  
4  
5 AQoL-8D multi-attribute utility instruments from web-based data. *Qual Life*  
6  
7 *Res*2016;25:3209-19. doi:10.1007/s11136-016-1337-z  
8  
9
- 10 33. Archbold PG, Stewart BJ, Greenlick MR, et al. Mutuality and preparedness as predictors  
11  
12 of caregiver role strain. *Res Nurs Health*1990;13:375-84. doi:10.1002/nur.4770130605  
13  
14
- 15 34. Schumacher K, Stewart BJ, Archbold PG, et al. Effects of caregiving demand, mutuality,  
16  
17 and preparedness on family caregiver outcomes during cancer treatment. *Oncol Nurs*  
18  
19 *Forum*2008;35:49-56. doi:10.1188/08.Onf.49-56  
20  
21
- 22 35. Henriksson A, Andershed B, Eva Benzein E, et al. Adaptation and psychometric  
23  
24 evaluation of the Preparedness for Caregiving Scale, Caregiver Competence Scale and  
25  
26 Rewards of Caregiving Scale in a sample of Swedish family members of patients with  
27  
28 life-threatening illness. *Palliat Med*2012;26:930-8. doi:10.1177/0269216311419987  
29  
30
- 31 36. Merluzzi T, Philip E, Vachon D, et al. Assessment of self-efficacy for caregiving: The  
32  
33 critical role of self-care in caregiver stress and burden. *Palliat Support Care*2011;9:15-24.  
34  
35 doi:10.1017/s1478951510000507  
36  
37
- 38 37. Cooper B, Kinsella GJ, Picton C. Development and initial validation of a family appraisal  
39  
40 of caregiving questionnaire for palliative care. *Psycho-oncology*2006;15:613-22.  
41  
42 doi:10.1002/pon.1001  
43  
44
- 45 38. Mahoney FI, Barthel DW. Functional evaluation: the Barthel index. *Md State Med*  
46  
47 *J*1965;14:61-5.  
48
- 49 39. Yeo D, Faleiro R, Lincoln NB. Barthel ADL index: A comparison of administration  
50  
51 methods. *Clin Rehabil*1995;9:34-9. doi:10.1177/026921559500900105  
52  
53
- 54 40. Aoun S, Monterosso L, Kristjanson L, et al. Measuring symptom distress in palliative  
55  
56 care: Psychometric properties of the Symptom Assessment Scale. *J Palliat*  
57  
58 *Med*2011;14:315-21. doi:10.1089/jpm.2010.0412  
59  
60

- 1  
2  
3 41. Toyé C, Walker H, Kristjanson LJ, et al. Measuring symptom distress among frail elders  
4  
5 capable of providing self-reports. *Nurs Health Sci*2005;7:184-91. doi:10.1111/j.1442-  
6  
7 2018.2005.00231.x  
8  
9
- 10 42. Hawthorne G, Osborne R. Population norms and meaningful differences for the  
11  
12 Assessment of Quality of Life (AQoL) measure. *Aust N Z J Public Health*2005;29:136-  
13  
14 42. doi:10.1111/j.1467-842x.2005.tb00063.x  
15  
16
- 17 43. Health Assessment. Lab Medical Outcomes Trust Quality Metric SF12v2 Health Survey.  
18  
19 2003  
20
- 21 44. Faul F, Erdfelder E, A. B, al e. Statistical power analyses using G\*Power 3.1: Tests for  
22  
23 correlation and regression analyses. *Behav Res Methods*2009;41:1149-60  
24  
25
- 26 45. Moore G, Audrey S, Barker M, et al. Process evaluation of complex interventions:  
27  
28 Medical Research Council guidance. *BMJ*2015;350. doi:10.1136/bmj.h1258  
29  
30
- 31 46. Braun V, Clarke V. Successful qualitative research; a practical guide for beginners.  
32  
33 London: Sage Publications; 2013.  
34  
35  
36  
37  
38  
39  
40  
41  
42  
43  
44  
45  
46  
47  
48  
49  
50  
51  
52  
53  
54  
55  
56  
57  
58  
59  
60

1  
2  
3 **FIGURE LEGENDS**  
4

5 **Figure 1.** Participant flow through the study  
6  
7  
8  
9  
10  
11  
12  
13  
14  
15  
16  
17  
18  
19  
20  
21  
22  
23  
24  
25  
26  
27  
28  
29  
30  
31  
32  
33  
34  
35  
36  
37  
38  
39  
40  
41  
42  
43  
44  
45  
46  
47  
48  
49  
50  
51  
52  
53  
54  
55  
56  
57  
58  
59  
60

For peer review only

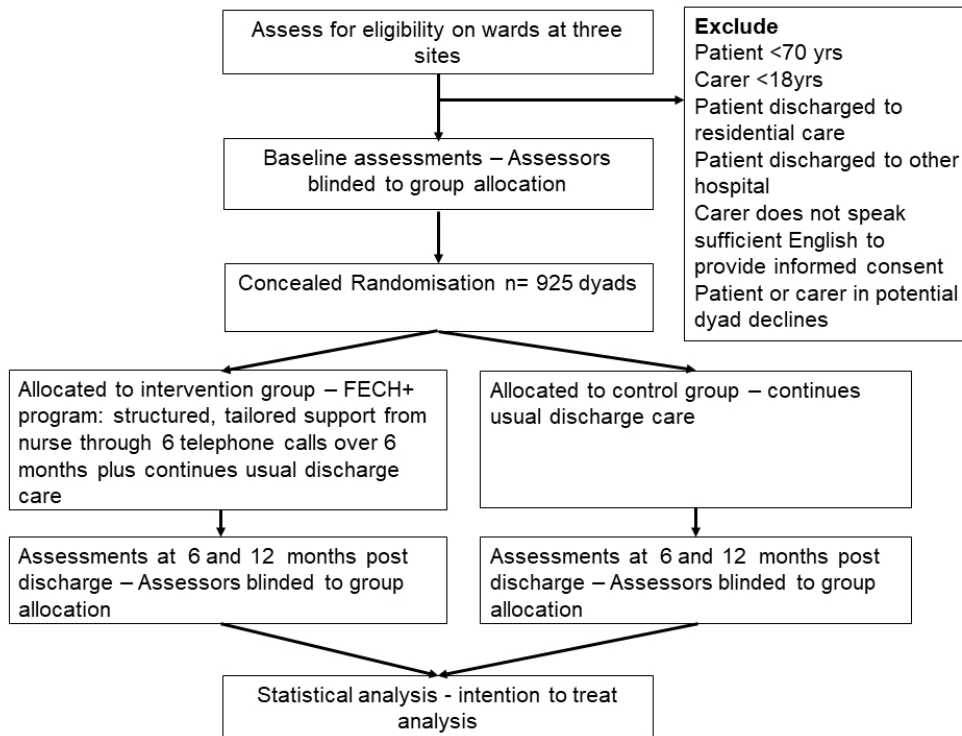

Participant flow through the study.

81x60mm (300 x 300 DPI)

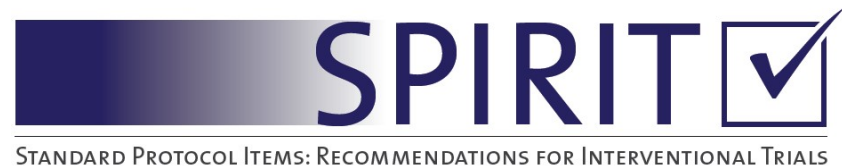

STANDARD PROTOCOL ITEMS: RECOMMENDATIONS FOR INTERVENTIONAL TRIALS

**Hill et al, 2020: Evaluating the provision of Further Enabling Care at Home (FECH+) for informal caregivers of older adults discharged home from hospital – protocol for a multicentre randomised controlled trial**

SPIRIT 2013 Checklist: Recommended items to address in a clinical trial protocol and related documents\*

| Section/item                      | Item No | Description                                                                                                  | Addressed on page number                                        |
|-----------------------------------|---------|--------------------------------------------------------------------------------------------------------------|-----------------------------------------------------------------|
| <b>Administrative information</b> |         |                                                                                                              |                                                                 |
| Title                             | 1       | Descriptive title identifying the study design, population, interventions, and, if applicable, trial acronym | 1                                                               |
| Trial registration                | 2a      | Trial identifier and registry name. If not yet registered, name of intended registry                         | 4                                                               |
|                                   | 2b      | All items from the World Health Organization Trial Registration Data Set                                     | Yes - see ANZCTR trial registry page link in manuscript page 10 |
| Protocol version                  | 3       | Date and version identifier                                                                                  | Published version is final                                      |
| Funding                           | 4       | Sources and types of financial, material, and other support                                                  | 25 – Funding statement                                          |
| Roles and responsibilities        | 5a      | Names, affiliations, and roles of protocol contributors                                                      | Title page and page 25                                          |

|                                                           |     |                                                                                                                                                                                                                                                                                          |                        |
|-----------------------------------------------------------|-----|------------------------------------------------------------------------------------------------------------------------------------------------------------------------------------------------------------------------------------------------------------------------------------------|------------------------|
|                                                           | 5b  | Name and contact information for the trial sponsor                                                                                                                                                                                                                                       | 25 –Funding statement  |
|                                                           | 5c  | Role of study sponsor and funders, if any, in study design; collection, management, analysis, and interpretation of data; writing of the report; and the decision to submit the report for publication, including whether they will have ultimate authority over any of these activities | 25 – Funding statement |
|                                                           | 5d  | Composition, roles, and responsibilities of the coordinating centre, steering committee, endpoint adjudication committee, data management team, and other individuals or groups overseeing the trial, if applicable (see Item 21a for data monitoring committee)                         | 22-23                  |
| <b>Introduction</b>                                       |     |                                                                                                                                                                                                                                                                                          |                        |
| Background and rationale                                  | 6a  | Description of research question and justification for undertaking the trial, including summary of relevant studies (published and unpublished) examining benefits and harms for each intervention                                                                                       | 6 -8                   |
|                                                           | 6b  | Explanation for choice of comparators                                                                                                                                                                                                                                                    | N/A                    |
| Objectives                                                | 7   | Specific objectives or hypotheses                                                                                                                                                                                                                                                        | 8                      |
| Trial design                                              | 8   | Description of trial design including type of trial (eg, parallel group, crossover, factorial, single group), allocation ratio, and framework (eg, superiority, equivalence, noninferiority, exploratory)                                                                                | 10                     |
| <b>Methods: Participants, interventions, and outcomes</b> |     |                                                                                                                                                                                                                                                                                          |                        |
| Study setting                                             | 9   | Description of study settings (eg, community clinic, academic hospital) and list of countries where data will be collected. Reference to where list of study sites can be obtained                                                                                                       | 11                     |
| Eligibility criteria                                      | 10  | Inclusion and exclusion criteria for participants. If applicable, eligibility criteria for study centres and individuals who will perform the interventions (eg, surgeons, psychotherapists)                                                                                             | 10                     |
| Interventions                                             | 11a | Interventions for each group with sufficient detail to allow replication, including how and when they will be administered                                                                                                                                                               | 12, 15, Table 1        |



|                                                                     |     |                                                                                                                                                                                                                                                                                                                                                                                |                                                       |
|---------------------------------------------------------------------|-----|--------------------------------------------------------------------------------------------------------------------------------------------------------------------------------------------------------------------------------------------------------------------------------------------------------------------------------------------------------------------------------|-------------------------------------------------------|
|                                                                     | 11b | Criteria for discontinuing or modifying allocated interventions for a given trial participant (eg, drug dose change in response to harms, participant request, or improving/worsening disease)                                                                                                                                                                                 | Refer protocol ANZCTR online registry link on page 10 |
|                                                                     | 11c | Strategies to improve adherence to intervention protocols, and any procedures for monitoring adherence (eg, drug tablet return, laboratory tests)                                                                                                                                                                                                                              |                                                       |
|                                                                     | 11d | Relevant concomitant care and interventions that are permitted or prohibited during the trial                                                                                                                                                                                                                                                                                  | N/A                                                   |
| Outcomes                                                            | 12  | Primary, secondary, and other outcomes, including the specific measurement variable (eg, systolic blood pressure), analysis metric (eg, change from baseline, final value, time to event), method of aggregation (eg, median, proportion), and time point for each outcome. Explanation of the clinical relevance of chosen efficacy and harm outcomes is strongly recommended | 16                                                    |
| Participant timeline                                                | 13  | Time schedule of enrolment, interventions (including any run-ins and washouts), assessments, and visits for participants. A schematic diagram is highly recommended (see Figure)                                                                                                                                                                                               | Table 2 – p 18                                        |
| Sample size                                                         | 14  | Estimated number of participants needed to achieve study objectives and how it was determined, including clinical and statistical assumptions supporting any sample size calculations                                                                                                                                                                                          | 19                                                    |
| Recruitment                                                         | 15  | Strategies for achieving adequate participant enrolment to reach target sample size                                                                                                                                                                                                                                                                                            | 19                                                    |
| <b>Methods: Assignment of interventions (for controlled trials)</b> |     |                                                                                                                                                                                                                                                                                                                                                                                |                                                       |
| Allocation:                                                         |     |                                                                                                                                                                                                                                                                                                                                                                                |                                                       |
| Sequence generation                                                 | 16a | Method of generating the allocation sequence (eg, computer-generated random numbers), and list of any factors for stratification. To reduce predictability of a random sequence, details of any planned restriction (eg, blocking) should be provided in a separate document that is unavailable to those who enrol participants or assign interventions                       | 11                                                    |
| Allocation concealment mechanism                                    | 16b | Mechanism of implementing the allocation sequence (eg, central telephone; sequentially numbered, opaque, sealed envelopes), describing any steps to conceal the sequence until interventions are assigned                                                                                                                                                                      | 11                                                    |

|    |                                                           |     |                                                                                                                                                                                                                                                                                                                                                                                                              |        |
|----|-----------------------------------------------------------|-----|--------------------------------------------------------------------------------------------------------------------------------------------------------------------------------------------------------------------------------------------------------------------------------------------------------------------------------------------------------------------------------------------------------------|--------|
| 1  | Implementation                                            | 16c | Who will generate the allocation sequence, who will enrol participants, and who will assign participants to interventions                                                                                                                                                                                                                                                                                    | 11-12  |
| 2  | Blinding (masking)                                        | 17a | Who will be blinded after assignment to interventions (eg, trial participants, care providers, outcome assessors, data analysts), and how                                                                                                                                                                                                                                                                    | 11-12  |
| 3  |                                                           | 17b | If blinded, circumstances under which unblinding is permissible, and procedure for revealing a participant's allocated intervention during the trial                                                                                                                                                                                                                                                         | n/a    |
| 4  | <b>Methods: Data collection, management, and analysis</b> |     |                                                                                                                                                                                                                                                                                                                                                                                                              |        |
| 5  | Data collection methods                                   | 18a | Plans for assessment and collection of outcome, baseline, and other trial data, including any related processes to promote data quality (eg, duplicate measurements, training of assessors) and a description of study instruments (eg, questionnaires, laboratory tests) along with their reliability and validity, if known. Reference to where data collection forms can be found, if not in the protocol | 16-17, |
| 6  |                                                           | 18b | Plans to promote participant retention and complete follow-up, including list of any outcome data to be collected for participants who discontinue or deviate from intervention protocols                                                                                                                                                                                                                    | 21     |
| 7  | Data management                                           | 19  | Plans for data entry, coding, security, and storage, including any related processes to promote data quality (eg, double data entry; range checks for data values). Reference to where details of data management procedures can be found, if not in the protocol                                                                                                                                            | 22     |
| 8  | Statistical methods                                       | 20a | Statistical methods for analysing primary and secondary outcomes. Reference to where other details of the statistical analysis plan can be found, if not in the protocol                                                                                                                                                                                                                                     | 19     |
| 9  |                                                           | 20b | Methods for any additional analyses (eg, subgroup and adjusted analyses)                                                                                                                                                                                                                                                                                                                                     | 19     |
| 10 |                                                           | 20c | Definition of analysis population relating to protocol non-adherence (eg, as randomised analysis), and any statistical methods to handle missing data (eg, multiple imputation)                                                                                                                                                                                                                              | 19     |
| 11 | <b>Methods: Monitoring</b>                                |     |                                                                                                                                                                                                                                                                                                                                                                                                              |        |
| 12 | Data monitoring                                           | 21a | Composition of data monitoring committee (DMC); summary of its role and reporting structure; statement of whether it is independent from the sponsor and competing interests; and reference to where further details about its charter can be found, if not in the protocol. Alternatively, an explanation of why a DMC is not needed                                                                        | 22     |

|                                 |     |                                                                                                                                                                                                                                  |        |
|---------------------------------|-----|----------------------------------------------------------------------------------------------------------------------------------------------------------------------------------------------------------------------------------|--------|
|                                 | 21b | Description of any interim analyses and stopping guidelines, including who will have access to these interim results and make the final decision to terminate the trial                                                          | n/a    |
| Harms                           | 22  | Plans for collecting, assessing, reporting, and managing solicited and spontaneously reported adverse events and other unintended effects of trial interventions or trial conduct                                                | 23     |
| Auditing                        | 23  | Frequency and procedures for auditing trial conduct, if any, and whether the process will be independent from investigators and the sponsor                                                                                      | 23     |
| <b>Ethics and dissemination</b> |     |                                                                                                                                                                                                                                  |        |
| Research ethics approval        | 24  | Plans for seeking research ethics committee/institutional review board (REC/IRB) approval                                                                                                                                        | 24     |
| Protocol amendments             | 25  | Plans for communicating important protocol modifications (eg, changes to eligibility criteria, outcomes, analyses) to relevant parties (eg, investigators, REC/IRBs, trial participants, trial registries, journals, regulators) | 23     |
| Consent or assent               | 26a | Who will obtain informed consent or assent from potential trial participants or authorised surrogates, and how (see Item 32)                                                                                                     | 11, 17 |
|                                 | 26b | Additional consent provisions for collection and use of participant data and biological specimens in ancillary studies, if applicable                                                                                            | 22     |
| Confidentiality                 | 27  | How personal information about potential and enrolled participants will be collected, shared, and maintained in order to protect confidentiality before, during, and after the trial                                             | 22     |
| Declaration of interests        | 28  | Financial and other competing interests for principal investigators for the overall trial and each study site                                                                                                                    | 25     |
| Access to data                  | 29  | Statement of who will have access to the final trial dataset, and disclosure of contractual agreements that limit such access for investigators                                                                                  | n/a    |
| Ancillary and post-trial care   | 30  | Provisions, if any, for ancillary and post-trial care, and for compensation to those who suffer harm from trial participation                                                                                                    | n/a    |

|                      |                            |     |                                                                                                                                                                                                                                                                                     |                      |
|----------------------|----------------------------|-----|-------------------------------------------------------------------------------------------------------------------------------------------------------------------------------------------------------------------------------------------------------------------------------------|----------------------|
| 1<br>2<br>3<br>4     | Dissemination policy       | 31a | Plans for investigators and sponsor to communicate trial results to participants, healthcare professionals, the public, and other relevant groups (eg, via publication, reporting in results databases, or other data sharing arrangements), including any publication restrictions | 24                   |
| 5<br>6               |                            | 31b | Authorship eligibility guidelines and any intended use of professional writers                                                                                                                                                                                                      | 23                   |
| 7<br>8               |                            | 31c | Plans, if any, for granting public access to the full protocol, participant-level dataset, and statistical code                                                                                                                                                                     | 21                   |
| 9<br>10              | <b>Appendices</b>          |     |                                                                                                                                                                                                                                                                                     |                      |
| 11<br>12<br>13<br>14 | Informed consent materials | 32  | Model consent form and other related documentation given to participants and authorised surrogates                                                                                                                                                                                  | Available on request |
| 15<br>16<br>17       | Biological specimens       | 33  | Plans for collection, laboratory evaluation, and storage of biological specimens for genetic or molecular analysis in the current trial and for future use in ancillary studies, if applicable                                                                                      | n/a                  |

18 \*It is strongly recommended that this checklist be read in conjunction with the SPIRIT 2013 Explanation & Elaboration for important clarification on the items.  
 19 Amendments to the protocol should be tracked and dated. The SPIRIT checklist is copyrighted by the SPIRIT Group under the Creative Commons  
 20 "[Attribution-NonCommercial-NoDerivs 3.0 Unported](https://creativecommons.org/licenses/by-nc-nd/3.0/)" license.  
 21  
 22  
 23  
 24  
 25  
 26  
 27  
 28  
 29  
 30  
 31  
 32  
 33  
 34  
 35  
 36  
 37  
 38  
 39  
 40  
 41  
 42

# BMJ Open

## Evaluating the provision of Further Enabling Care at Home (FECH+) for informal caregivers of older adults discharged home from hospital – protocol for a multicentre randomised controlled trial

|                                 |                                                                                                                                                                                                                                                                                                                                                                                                                                                                                                                                                                                                                                                                                                                                                                                                                                                                                                                                                                                                                                                                                                                                                                                                                                                                                                                                                                                                                                                                                                                                                                                                                    |
|---------------------------------|--------------------------------------------------------------------------------------------------------------------------------------------------------------------------------------------------------------------------------------------------------------------------------------------------------------------------------------------------------------------------------------------------------------------------------------------------------------------------------------------------------------------------------------------------------------------------------------------------------------------------------------------------------------------------------------------------------------------------------------------------------------------------------------------------------------------------------------------------------------------------------------------------------------------------------------------------------------------------------------------------------------------------------------------------------------------------------------------------------------------------------------------------------------------------------------------------------------------------------------------------------------------------------------------------------------------------------------------------------------------------------------------------------------------------------------------------------------------------------------------------------------------------------------------------------------------------------------------------------------------|
| Journal:                        | <i>BMJ Open</i>                                                                                                                                                                                                                                                                                                                                                                                                                                                                                                                                                                                                                                                                                                                                                                                                                                                                                                                                                                                                                                                                                                                                                                                                                                                                                                                                                                                                                                                                                                                                                                                                    |
| Manuscript ID                   | bmjopen-2020-046600.R1                                                                                                                                                                                                                                                                                                                                                                                                                                                                                                                                                                                                                                                                                                                                                                                                                                                                                                                                                                                                                                                                                                                                                                                                                                                                                                                                                                                                                                                                                                                                                                                             |
| Article Type:                   | Protocol                                                                                                                                                                                                                                                                                                                                                                                                                                                                                                                                                                                                                                                                                                                                                                                                                                                                                                                                                                                                                                                                                                                                                                                                                                                                                                                                                                                                                                                                                                                                                                                                           |
| Date Submitted by the Author:   | 29-Apr-2021                                                                                                                                                                                                                                                                                                                                                                                                                                                                                                                                                                                                                                                                                                                                                                                                                                                                                                                                                                                                                                                                                                                                                                                                                                                                                                                                                                                                                                                                                                                                                                                                        |
| Complete List of Authors:       | Hill, Anne-Marie; Curtin University, School of Physiotherapy and Exercise Science; Curtin University, School of Nursing, Midwifery and Paramedicine<br>Moorin, Rachael; Curtin University, School of Public Health<br>Slatyer, Susan; Murdoch University, Discipline of School of Nursing<br>Bryant, Christina; University of Melbourne, Melbourne School of Psychological Sciences<br>Hill, Keith; Monash University, Rehabilitation Ageing and Independent Living (RAIL) Research Centre<br>Waldron, Nicholas; Armadale Health Service<br>Aoun, Samar ; La Trobe University, School of Psychology and Public Health; Perron Institute for Neurological and Translational Science<br>Kamdar, Ami; Sir Charles Gairdner Hospital, Department of General Medicine<br>Grealish, Laurie; Gold Coast Hospital and Health Services; Griffith University, School of Nursing and Midwifery Nathan and Gold Coast<br>Reberger, Caroline; Sir Charles Gairdner Hospital, Department of Rehabilitation and Aged Care<br>Jones, Cindy; Griffith University, Menzies Health Institute Queensland; Bond University, Faculty of Health Sciences & Medicine<br>Bronson, Mary; Sir Charles Gairdner Hospital, Medical Division<br>Bulsara, Max; The University of Notre Dame Australia, Institute for Health Research<br>Maher, Sean; Sir Charles Gairdner Hospital, Department of Rehabilitation and Aged Care<br>Claverie, Tracey; Gold Coast Hospital and Health Services<br>Moyle, Wendy; Griffith University, School of Nursing and Midwifery Nathan and Gold Coast; Griffith University, Menzies Health Institute Queensland |
| <b>Primary Subject Heading</b>: | Geriatric medicine                                                                                                                                                                                                                                                                                                                                                                                                                                                                                                                                                                                                                                                                                                                                                                                                                                                                                                                                                                                                                                                                                                                                                                                                                                                                                                                                                                                                                                                                                                                                                                                                 |
| Secondary Subject Heading:      | Geriatric medicine, Nursing                                                                                                                                                                                                                                                                                                                                                                                                                                                                                                                                                                                                                                                                                                                                                                                                                                                                                                                                                                                                                                                                                                                                                                                                                                                                                                                                                                                                                                                                                                                                                                                        |
| Keywords:                       | GERIATRIC MEDICINE, INTERNAL MEDICINE, Quality in health care < HEALTH SERVICES ADMINISTRATION & MANAGEMENT                                                                                                                                                                                                                                                                                                                                                                                                                                                                                                                                                                                                                                                                                                                                                                                                                                                                                                                                                                                                                                                                                                                                                                                                                                                                                                                                                                                                                                                                                                        |

1  
2  
3  
4  
5  
6  
7  
8  
9  
10  
11  
12  
13  
14  
15  
16  
17  
18  
19  
20  
21  
22  
23  
24  
25  
26  
27  
28  
29  
30  
31  
32  
33  
34  
35  
36  
37  
38  
39  
40  
41  
42  
43  
44  
45  
46  
47  
48  
49  
50  
51  
52  
53  
54  
55  
56  
57  
58  
59  
60

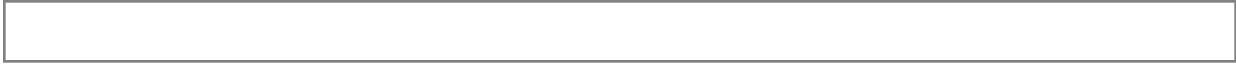

SCHOLARONE™  
Manuscripts

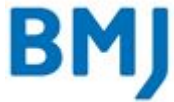

I, the Submitting Author has the right to grant and does grant on behalf of all authors of the Work (as defined in the below author licence), an exclusive licence and/or a non-exclusive licence for contributions from authors who are: i) UK Crown employees; ii) where BMJ has agreed a CC-BY licence shall apply, and/or iii) in accordance with the terms applicable for US Federal Government officers or employees acting as part of their official duties; on a worldwide, perpetual, irrevocable, royalty-free basis to BMJ Publishing Group Ltd ("BMJ") its licensees and where the relevant Journal is co-owned by BMJ to the co-owners of the Journal, to publish the Work in this journal and any other BMJ products and to exploit all rights, as set out in our [licence](#).

The Submitting Author accepts and understands that any supply made under these terms is made by BMJ to the Submitting Author unless you are acting as an employee on behalf of your employer or a postgraduate student of an affiliated institution which is paying any applicable article publishing charge ("APC") for Open Access articles. Where the Submitting Author wishes to make the Work available on an Open Access basis (and intends to pay the relevant APC), the terms of reuse of such Open Access shall be governed by a Creative Commons licence – details of these licences and which [Creative Commons](#) licence will apply to this Work are set out in our licence referred to above.

Other than as permitted in any relevant BMJ Author's Self Archiving Policies, I confirm this Work has not been accepted for publication elsewhere, is not being considered for publication elsewhere and does not duplicate material already published. I confirm all authors consent to publication of this Work and authorise the granting of this licence.

**Title**

Evaluating the provision of Further Enabling Care at Home (FECH+) for informal caregivers of older adults discharged home from hospital – protocol for a multicentre randomised controlled trial

**Authors**

Anne-Marie Hill,<sup>1,2</sup> Rachael Moorin,<sup>3</sup> Susan Slatyer,<sup>4</sup> Christina Bryant,<sup>5</sup> Keith Hill,<sup>6</sup> Nicholas Waldron,<sup>7</sup> Samar Aoun,<sup>8,9</sup> Ami Kamdar,<sup>10</sup> Laurie Grealish,<sup>11,12,13</sup> Caroline Reberger,<sup>14</sup> Cindy Jones,<sup>12,15</sup> Mary Bronson,<sup>16</sup> Max Bulsara,<sup>17</sup> Sean Maher,<sup>14</sup> Tracey Claverie,<sup>11</sup> Wendy Moyle<sup>12,13</sup>

1. School of Physiotherapy and Exercise Science, Curtin University, Perth, Australia
2. School of Nursing, Midwifery and Paramedicine, Curtin University, Perth, Australia
3. School of Public Health, Curtin University, Perth, Australia
4. Discipline of School of Nursing, College of Science, Health Engineering and Education, Murdoch University, Murdoch, Australia
5. Melbourne School of Psychological Sciences, University of Melbourne, Melbourne, Australia
6. Rehabilitation Ageing and Independent Living (RAIL) Research Centre, Monash University, Melbourne, Australia
7. Armadale Health Service, Armadale, Australia
8. School of Psychology and Public Health, La Trobe University, Melbourne, Australia
9. Perron Institute for Neurological and Translational Science, Perth, Australia
10. Department of General Medicine, Sir Charles Gairdner Hospital, Nedlands, Australia
11. Gold Coast Hospital and Health Services, Gold Coast, Australia
12. Menzies Health Institute Queensland, Griffith University, Brisbane, Australia



- 1  
2  
3 13. School of Nursing and Midwifery Nathan and Gold Coast, Griffith University, Brisbane,  
4  
5 Australia  
6  
7  
8 14. Department of Rehabilitation and Aged Care, Sir Charles Gairdner Osborne Park Health  
9  
10 Care Group, Nedlands, Australia  
11  
12 15. Faculty of Health Sciences & Medicine, Bond University, Gold Coast, Australia  
13  
14 16. Medical Division, Sir Charles Gairdner Osborne Park Health Care Group, Nedlands,  
15  
16 Australia  
17  
18 17. Institute for Health Research, The University of Notre Dame, Fremantle, Australia  
19  
20  
21  
22  
23  
24

25 **Corresponding author**

26 Professor Anne-Marie Hill

27 Curtin University, School of Physiotherapy and Exercise Science

28 Kent Street,

29 Bentley

30 Western Australia

31 Phone: +61892664104

32 Email: [Anne-Marie.Hill@curtin.edu.au](mailto:Anne-Marie.Hill@curtin.edu.au)

33 ORCID ID – <https://orcid.org/0000-0003-1411-6752>

34  
35  
36  
37  
38  
39  
40  
41  
42  
43  
44  
45  
46  
47  
48 **Word count 4543**  
49  
50  
51  
52  
53  
54  
55  
56  
57  
58  
59  
60

## ABSTRACT

### Introduction

There are personal and societal benefits from caregiving; however, caregiving can jeopardise caregivers' health. The Further Enabling Care at Home (FECH+) program provides structured nurse support, through telephone outreach, to informal caregivers of older adults following discharge from acute hospital care to home. The trial aims to evaluate the efficacy of the FECH+ program on caregivers' health-related quality of life (HRQOL) after care recipients' hospital discharge.

### Methods and analysis

A multi-site, parallel-group, randomised controlled trial with blinded baseline and outcome assessment and intention-to-treat analysis, adhering to CONSORT guidelines will be conducted. Participants (N=925 dyads) comprising informal home caregiver (18 years or older) and care recipient (70 years or older) will be recruited when the care recipient is discharged from hospital. Caregivers of patients discharged from wards in three hospitals in Australia (one in Western Australia, two in Queensland) are eligible for inclusion. Participants will be randomly assigned to one of two groups. The intervention group receive the FECH+ program, which provides structured support and problem solving for the caregiver after the care recipient's discharge, in addition to usual care. The control group receives usual care. The program is delivered by a registered nurse and comprises six 30 to 45-minute telephone support sessions over six months. The primary outcome is caregivers' HRQOL measured using the AQOL-8D. Secondary outcomes include caregiver preparedness, strain and distress, and use of health care services. Changes in HRQOL

1  
2  
3 between groups will be compared using a mixed regression model that accounts for the  
4 correlation between repeated measurements.  
5  
6  
7

### 8 9 **Ethics and dissemination**

10  
11  
12 Participants will provide written informed consent. Ethics approvals have been obtained from  
13 Sir Charles Gairdner and Osborne Park Health Care Group, Curtin University, Griffith  
14 University, Gold Coast Health Service, and government health data linkage services.  
15  
16  
17 Findings will be disseminated through presentations, peer-reviewed journals and conferences.  
18  
19  
20  
21  
22  
23  
24

### 25 **Trial Registration number**

26  
27 Australian New Zealand Clinical Trials Registry, ACTRN12620000060943  
28  
29  
30  
31

### 32 **Keywords**

33  
34 Patient discharge, caregivers, randomised controlled trial, dyad, aged, telephone-based  
35 intervention  
36  
37  
38  
39  
40  
41  
42  
43  
44  
45  
46  
47  
48  
49  
50  
51  
52  
53  
54  
55  
56  
57  
58  
59  
60

### Strengths and limitations of this study

- The study uses a multi-centre randomised design with blinded baseline and outcome assessment.
- Follow-up time points of six and 12 months allow robust evaluation of the effect of the FECH+ program on caregivers' outcomes as well as the use of health services.
- Evaluating secondary outcomes, including caregiver distress and preparedness to care will provide further insight into the intervention effect.
- Participants cannot be blinded to receiving the intervention.
- The care recipients are older and therefore mortality and hospital readmission may affect the recruitment or retention of participants.

## INTRODUCTION

In Australia, an estimated 2.65 million people provide informal care, 32% as primary caregivers, of whom over 60% provide support for a spouse or parent.[1] The proportion of older adults (aged 65 years and over) across the world is expected to double from 12% in 2020 to 22% by 2050[2] and in Australia older people expect to continue to live at home, with less than 5% of older people living in Residential Aged Care (RAC) accommodation.[1] Hence informal caregivers are critical in supporting older people to live at home for as long as possible.[3]

Caregivers, however, report significant personal costs associated with care, including serious financial, social and health problems.[4, 5] Caregivers repeatedly report lower levels of wellbeing than the general population. Mental health risks are particularly severe, with caregivers reporting significantly higher levels of loneliness, anxiety, depression and stress than the general population.[4-7] A systematic review found evidence of a negative impact of caregiving on both the mental and physical health of the informal caregiver.[8] Rising levels of caregiver stress are known to predict premature admission of the care recipient to RAC.[9]

There is limited evidence that providing supportive programs, such as face to face training, telephone support or online digital programs, can reduce the adverse consequences of caregiving for older adults.[10-13] In addition to problems faced by caregivers in providing ongoing care, there is limited evidence about how to effectively support caregivers of older adults when they are discharged from hospital, including what interventions can sustain and improve caregivers' health and wellbeing.[14-16] Older adults discharged from hospital are at high risk of functional decline, unplanned hospital readmissions and injurious falls.[17-19] This transition can be particularly problematic for older adults who receive care support and

1  
2  
3 their caregivers. Lack of continuity of care and inadequate communication and discharge  
4 plans during this time of transition can increase caregiver burden even further.[20, 21] A  
5 recent meta-analysis of 23 trials found low quality evidence that informal caregiver  
6 interventions provided after hospital discharge may reduce caregiver burden and anxiety in  
7 stroke populations. However, they did not change health related quality of life (HRQOL),  
8 anxiety, or health resource use.[15] Over 90% of the included trials were conducted in stroke  
9 populations thereby providing limited generalisability. Another systematic review of 21 trials  
10 found that telephone interventions providing support for caregivers may slightly reduce  
11 anxiety and improve preparedness to care, but did not significantly improve other caregiver  
12 outcomes.[16] None of the included trials in this review measured changes in HRQOL[16]  
13 and both reviews recommended further high-quality trials in caregiver populations. Recent  
14 qualitative research conducted with caregivers of older adults discharged from hospital  
15 indicated that negative impacts of caregiving at this time can stem from feelings of  
16 uncertainty exacerbated by gaps in formal support, the strain of balancing caregiving with  
17 other life demands and a sense of helplessness.[22] Therefore further trials that design and  
18 evaluate interventions to support caregivers when the older adult they care for is transitioning  
19 from hospital to home are required.  
20  
21  
22  
23  
24  
25  
26  
27  
28  
29  
30  
31  
32  
33  
34  
35  
36  
37  
38  
39  
40  
41  
42  
43  
44

45 We conducted an RCT evaluating the Further Enabling Care at Home (FECH) program, a  
46 telephone-based intervention delivered to caregivers when the older adult they cared for was  
47 discharged from hospital.[11] Telephone interventions are part of a suite of expanding  
48 telehealth technologies that demonstrate early evidence for providing support for caregivers  
49 and families.[23] A brief intervention of seven CBT 60-minute telephone sessions for  
50 caregivers of adults with dementia resulted in improved caregiver emotional wellbeing,  
51 decreased exhaustion and reduced depressive symptoms.[24] Caregivers asked to rate their  
52  
53  
54  
55  
56  
57  
58  
59  
60

1  
2  
3 preferences for telehealth technologies rated telephone as the highest preferred form of  
4 technology compared to videoconferencing, facebook, email and other technologies and  
5  
6 telephones have the advantage of being usable for those without access to suitable technology  
7  
8 and internet.[25] A review of telephone and computer delivered interventions for caregivers  
9  
10 of people living with dementia found that these intervention have potential to improve  
11  
12 caregiver wellbeing, in particular those that incorporated various elements of psycho-  
13  
14 education, peer support, skills training and health assessments but that further high quality  
15  
16 trials were required.[26] The FECH telephone program provided support for caregivers in a  
17  
18 timely and convenient manner in their own home. It was tailored to address the caregivers'  
19  
20 identified support needs by providing immediate information and resources.[11] In contrast to  
21  
22 previous studies providing caregiver support,[15, 16] the FECH program delivered promising  
23  
24 results when piloted with caregivers of older patients following hospital discharge. The  
25  
26 program significantly reduced caregiver strain and distress and increased preparedness to  
27  
28 care.[11] Caregivers also reported high levels of satisfaction with the program.[27] While the  
29  
30 program achieved a moderate effect size that was clinically significant,[11] the FECH  
31  
32 program had some limitations. Caregiver support was limited to receiving three telephone  
33  
34 contacts over three weeks after discharge and did not take an approach that assisted  
35  
36 caregivers to develop and implement problem-solving skills. The trial was conducted in a  
37  
38 single hospital ward and 141 dyads provided data at all timepoints. Since it is evident that  
39  
40 caring frequently results in a significant negative impact across mental, physical, social and  
41  
42 emotional health of caregivers,[4, 5] we seek to measure the impact of the intervention by  
43  
44 using a HRQOL tool. These tools are patient reported outcome measures and therefore  
45  
46 capture the individuals own perception of their health and wellbeing in a broad sense  
47  
48 including their quality of life.[28] Therefore we aim to increase the duration and intensity of  
49  
50 the program (FECH+) and conduct a multi-centre RCT to evaluate whether the FECH+  
51  
52  
53  
54  
55  
56  
57  
58  
59  
60

1  
2  
3 program may improve caregivers' HRQOL. Secondary aims will assist to explore potential  
4 causal mechanisms (such as reduction in caregiver distress and improved caregiver self-  
5 efficacy) by which participation in the FECH+ program in addition to usual discharge care  
6 may improve caregiver HRQOL. Since the original FECH program improved caregiving  
7 preparedness, we also seek to examine if the FECH+ program results in improvements in  
8 care, and therefore in care recipients' levels of independence and symptoms of distress.  
9  
10  
11  
12  
13  
14  
15  
16  
17  
18

### 19 **Aims and hypotheses**

20  
21 The primary aims of the trial are to i) evaluate the efficacy of participation in the FECH+  
22 program in addition to usual discharge care on HRQOL of caregivers of older adults  
23 discharged home from hospital, compared to receiving usual discharge care alone: ii)  
24 evaluate the cost-effectiveness of the intervention using the framework of a within-trial, cost-  
25 utility analysis. The secondary aims are to evaluate the efficacy of participation in the  
26 FECH+ program in addition to usual discharge care on: i) caregiver preparedness to care,  
27 caregiver self-efficacy and levels of strain and distress; ii) care recipient outcomes of  
28 symptoms of distress and level of independence, compared to usual discharge care alone.  
29  
30  
31  
32  
33  
34  
35  
36  
37  
38  
39  
40  
41

42 The primary hypothesis is that caregivers participating in the FECH+ program in addition to  
43 receiving usual hospital discharge care (intervention group) when compared with caregivers  
44 receiving usual discharge care alone (control group), will report improved HRQOL.  
45  
46  
47  
48

49 Secondary hypotheses are that the: i) intervention group will report improved caregiving  
50 preparedness, decreased strain and distress, and improved caregiver self-efficacy compared to  
51 the control group; and ii) care recipients in the intervention group will experience decreased  
52 symptom distress and improved independence compared to the control group.  
53  
54  
55  
56  
57  
58  
59  
60



1  
2  
3 A separate process evaluation will be conducted to explore how caregiving is impacted by  
4 participating in the FECH+ program and identify aspects of implementation that particularly  
5 contribute to effectiveness. A subsequent trial-based economic evaluation will evaluate the  
6 cost-effectiveness of the intervention using the framework of a within-trial, cost-utility  
7 analysis.  
8  
9  
10  
11  
12  
13  
14  
15  
16  
17  
18  
19  
20  
21  
22  
23  
24  
25  
26  
27  
28  
29  
30  
31  
32  
33  
34  
35  
36  
37  
38  
39  
40  
41  
42  
43  
44  
45  
46  
47  
48  
49  
50  
51  
52  
53  
54  
55  
56  
57  
58  
59  
60

For peer review only

## METHODS AND ANALYSIS

### Design

The trial is a multi-centre parallel two-group RCT with 1:1 dyad allocation to the intervention (FECH+ program in addition to usual care) group or the control (usual care alone) group. The study will adhere to the Consolidated Standards of Reporting Trials (CONSORT) guidelines (see **Figure 1**).[29] This protocol is reported in accordance with the Standard Protocol Items: Recommendations for Interventional Trials (SPIRIT) 2013 Statement (see **Additional file 1**).[30] The trial is registered through the Australian New Zealand Clinical Trials Registry (ACTRN12620000060943).

### Participants

Participants will be enrolled as dyads (caregiver and care recipient). To be eligible for the study caregivers must be: a) aged 18 years or older; b) providing unpaid support as a caregiver to a patient (care recipient) aged 70 years or older when this care recipient is discharged home from a ward included in the study; care recipients must be: c) discharged home from a ward included in the study. Exclusion criteria are that care recipients are discharged to a setting other than home (such as to a nursing home or another hospital) or undertake a hospital in the home program. Based on a definition of a caregiver used in an Australian study investigating the support of frail older people,[31] caregivers are defined as family members or friends providing care and support to older people. The support must be regular (at least weekly) ongoing, home-based and can be physical and/or emotional care. In Australia unpaid care and support is provided by family and friends on a voluntary basis as compared to paid caregivers who provide personal and home care services through aged care organisations.

## Setting

The trial will be conducted at three public hospitals in Australia. In Western Australia (WA), the site is Sir Charles Gairdner Hospital, a metropolitan tertiary hospital with approximately 600 beds. In Queensland (QLD), the two hospitals are Robina Hospital (approximately 400 beds) and Gold Coast University Hospital (approximately 600 beds). Wards included in the trial admit medical patients, of whom large numbers are aged over 70 years.

## Randomisation and Blinding

The WA Health Translation Network's Clinical Trials and Data Management Centre (CTDMC) will administer the randomisation process. The allocation list has been generated prior to trial commencement by the CTDMC using computer-generated random numbers and organised such that recruitment to the two study arms (WA and QLD) occurs at an approximately equal rate. The treatment allocation list is stored as a password protected file at Curtin University and is only accessible to the trial's CTDMC administrators. The research assistants (RAs) enter all baseline data directly into a secure online database. Completion of baseline data entry automatically triggers the allocation of the dyad (caregiver and care recipient) to the next number in the sequence and triggers an alert to the project manager, who contacts the FECH+ nurse if the dyad is allocated to the intervention group.

The investigators on the trial team are not involved in recruitment or data collection and all investigators, including the statistical team, are blinded to group allocation until after analyses are completed. RAs who enrol patients and conduct baseline and outcome assessments are blinded to group allocation throughout the study. The project manager is the only team member to see the group allocation as she manages the trial procedure. The nurses

1  
2  
3 who deliver the intervention know which participants receive the intervention, but are not  
4 involved in baseline or outcome data collection. Hospital staff who organise discharge  
5 services remain blinded to participants' enrolment into the study. Participants are not  
6 specifically informed of their group allocation but cannot be blinded to the intervention they  
7 receive. Participants will be instructed at enrolment and during monthly phone calls not to  
8 divulge their allocation to research staff. RAs who conduct baseline and outcome assessments  
9 are based in the hospitals while the nurses who deliver the intervention are located at the  
10 Universities, to maintain blinding of staff.  
11  
12  
13  
14  
15  
16  
17  
18  
19  
20  
21  
22  
23

### 24 **Intervention**

25  
26 Participants allocated to the intervention receive the FECH+ program in addition to usual  
27 care. A summary of the FECH+ program is presented in **Table 1** using the Template for  
28 Intervention Description and Replication (TIDieR) checklist.[32] The FECH+ program is a  
29 telephone-based, post-hospital-discharge intervention delivered to the caregiver by one or  
30 more specially trained 'FECH+' nurses. These registered nurses have acute gerontological  
31 nursing care experience, have substantial knowledge on how to navigate the home care  
32 system, and receive training in the FECH+ intervention.  
33  
34  
35  
36  
37  
38  
39  
40  
41  
42  
43  
44  
45  
46  
47  
48  
49  
50  
51  
52  
53  
54  
55  
56  
57  
58  
59  
60

**Table 1.** Summary of the FECH+ program (TIDieR checklist).

|                     |                                                                                                                                                                                                                                                                                                                                                                                                                                                                                                                                                                                                                                              |
|---------------------|----------------------------------------------------------------------------------------------------------------------------------------------------------------------------------------------------------------------------------------------------------------------------------------------------------------------------------------------------------------------------------------------------------------------------------------------------------------------------------------------------------------------------------------------------------------------------------------------------------------------------------------------|
| 1. Brief name       | Further Enabling Care at Home (FECH+) for informal caregivers of older adults discharged home from hospital.                                                                                                                                                                                                                                                                                                                                                                                                                                                                                                                                 |
| 2. Why              | The FECH+ program offers a problem-solving, caregiver-focussed approach to improve outcomes for the caregiver and care recipient that is complementary to usual discharge care. It is designed to provide caregivers with timely health professional support and training to use the resources available in the community. It aims to develop problem-solving skills and address the caregiver's identified needs.                                                                                                                                                                                                                           |
| 3. What- materials  | The caregiver completes the CSNAT[33] with support provided by the FECH+ nurse. A standard operating procedures manual is used by the nurse delivering the intervention. Resources relevant for individual caregivers, such as contacts for organisations, are emailed or mailed to participants as required. Caregivers are provided with an initial booklet and an individualised summary sheet after the final phone call.                                                                                                                                                                                                                |
| 4. What- procedures | The FECH+ nurse facilitates caregivers to (a) reflect upon the current caregiving situation, (b) identify and prioritise new or ongoing support needs, and (c) implement a problem-solving approach to address these support needs. Caregivers are guided to address three prioritised needs using problem-solving techniques and goal setting. The first phone call explores the caregiver's understanding of discharge information. During subsequent phone calls caring responsibilities are discussed, using the CSNAT[33] to identify problems. The program aims to facilitate the development of caregivers' problem-solving skills to |

- 1  
2  
3 continue without support from the FECH+ nurse after the intervention  
4  
5 is completed. Each contact point provides an opportunity to reinforce  
6  
7 the problem-solving skills learnt.  
8  
9
- 10 5. Who provided Registered nurses experienced in gerontological nursing and who have  
11  
12 received training in delivering the FECH+ program.  
13  
14
- 15 6. How The FECH+ program is delivered via telephone to the caregiver after  
16  
17 the care recipient is discharged from hospital.  
18  
19
- 20 7. Where Delivered directly to the caregiver in their home.  
21  
22
- 23 8. When and how Six telephone calls by the FECH+ nurse after the care recipient's  
24  
25 much discharge from hospital. *Call 1*) during the first week after discharge  
26  
27 (15 minutes); *Call 2*) at two weeks after discharge (approximately 45  
28  
29 minutes); *Calls 3 to 6*) at 1, 2, 4, and 6 months respectively after  
30  
31 discharge, (each approximately 30 minutes).  
32  
33
- 34 9. Tailoring The intervention is tailored to the needs of each caregiver, using a  
35  
36 problem-solving approach to identify, prioritise, and address the top  
37  
38 three support needs. Individual resources are provided to participants  
39  
40 according to problems or needs identified.  
41  
42
- 43 10. Modifications to be reported at study conclusion  
44  
45
- 46 11. Fidelity to be reported at study conclusion  
47  
48
- 49 12. Adherence to be reported at study conclusion  
50  
51

---

Notes: CSNAT = Carer Support Needs Assessment Tool

---

52  
53  
54  
55  
56  
57  
58  
59  
60

1  
2  
3  
4  
5 The original FECH program[11] has been expanded (FECH+) to encourage and build the  
6 caregiver's use of problem-solving skills, through instruction and role modelling, that they  
7 can continue to use after the intervention period. Problem-solving is a practical step-by-step  
8 approach typically involving identifying and defining the problem, understanding it, setting  
9 goals and generating solutions, implementing a course of action, and evaluating its  
10 efficacy.[34]  
11  
12  
13  
14  
15  
16  
17  
18  
19  
20  
21

## 22 Training

23 The FECH+ nurses undertake three days face to face training in a group setting. This includes  
24 how to assess the caregiver's understanding of discharge information, how to use the  
25 Caregiver Support Needs Assessment Tool (CSNAT)[33] to facilitate the caregivers'  
26 identifying and prioritising support needs, and how to assist the caregiver to undertake a  
27 problem-solving approach.[34] The CSNAT has 14 items with Likert-type response options  
28 that rate needs for support in two domains: enabling the caregiver to care for the care  
29 recipient at home and enabling support for the caregiver in their caring role.[33] Training  
30 materials include the resources associated with the online CSNAT toolkit[35] and an  
31 electronic manual that provides information for caregivers related to care provision for older  
32 people in Australia, as well as a manual tailored for each state that outlines the problem-  
33 solving approach.[27] It is envisaged that two to three nurses will be employed at each site.  
34  
35  
36  
37  
38  
39  
40  
41  
42  
43  
44  
45  
46  
47  
48  
49 Regular meetings for nurses to consolidate training procedures and to assist to monitor  
50 fidelity of intervention delivery will be conducted by the project manager and trial leaders  
51 (AMH, CB, SS, LG). The project manager will also monitor data entry for intervention  
52 delivery through the online database.  
53  
54  
55  
56  
57  
58  
59  
60

## Usual Care

All participants in both intervention and control groups will receive usual discharge care.

Usual discharge care includes providing the care recipient and/or caregiver with a copy of the discharge letter, medications or prescriptions, outpatient appointments and home care programs organised by the hospital team. Social work input for caregivers is not routine but may occur when prioritised by the ward social worker during admission.

## Outcome Measures

The primary outcome (primary aim i) is caregivers' HRQOL at six months after hospital discharge measured using the 35-item Assessment of Quality of Life – 8 dimensions (AQoL-8D).[36, 37] The AQoL-8D captures psycho-social as well as physical health domains (Independent Living, Happiness, Mental Health, Coping, Relationships, Self-Worth, Pain, Senses) and can be administered by telephone. The focus on psychosocial domains makes this instrument appropriate for our study since the dominant factor affecting choice of a multi-attribute utility instrument (MAUI) is its ability to capture facets of health states relevant to the research question.[38] It has established validity and reliability, and good psychometric properties which capture psycho-social as well as physical health domains.[37] Australian norms have been established for the AQoL-8D.[39]

Secondary outcomes are chosen to understand possible causal mechanisms of the intervention effect. For example, improved preparedness to care and reduction of caregiver strain and distress may improve caregivers HRQOL. Better prepared caregivers may in turn more effectively manage care recipients' symptoms and functional limitations. The PCS, FACQ, SAS and BADLI assessment instruments were previously evaluated in our pilot trial as being feasible to administer to caregivers over the telephone.[11] Secondary outcomes are:



1  
2  
3 1. Caregivers' HRQOL at 12 months after hospital discharge (primary aim i: secondary  
4 timepoint) measured using the 35-item AQoL-8D.[36, 37]  
5

6  
7 Other secondary outcomes evaluated at six and 12 months after hospital discharge include:  
8

9  
10 2. Caregivers' self-rated preparedness for caregiving (secondary aim i), measured using  
11 the Preparedness for Caregiving Scale (PCS),[40] which covers multiple domains of  
12 caregiving including preparedness to provide physical, emotional and instrumental care along  
13 with managing the stress of caregiving. This 8-item scale has five response options (0=not at  
14 all prepared, 4=very well prepared) and is designed for use with caregivers of older adults  
15 receiving homecare/experiencing care transitions. The construct validity for the PCS has been  
16 established in older adults.[41] Testing in patients with life-threatening illness confirmed  
17 satisfactory internal consistency, reliability and stability, and unidimensionality.[42]  
18

19  
20 3. Caregivers' self-efficacy (secondary aim i), measured with the 21-item Caregiver  
21 Inventory (CGI).[43] Self-efficacy is built through a mastery of tasks and ability to persist  
22 and has been shown to improve caregiver wellbeing.[7] This questionnaire has four sub-  
23 scales confirmed by factor analysis: Cronbach's alpha for the scale was 0.91 in a sample of  
24 caregivers of patients for whom the main diagnoses were cancer, chronic obstructive  
25 pulmonary disease, stroke, chronic heart failure, and dementia. Responses are provided using  
26 a five-point Likert scale.  
27

28  
29 4. Caregivers' strain and distress [secondary aim i], measured by the corresponding  
30 sub-scales of the Family Appraisal of Caregiving Questionnaire- Palliative Care (FACQ), for  
31 which good internal consistency, reliability and construct validity are confirmed.[44]  
32 Responses are provided using a five point Likert scale.  
33

34  
35  
36  
37  
38  
39  
40  
41  
42  
43

44 5. Care recipients' level of independence (secondary aim ii), reported by caregivers  
45 using the Barthel Activities of Daily Living Index (BADLI), which has established reliability  
46 and validity.[45]  
47  
48  
49  
50  
51  
52  
53  
54  
55  
56  
57  
58  
59  
60

6. Care recipients' symptoms (secondary aim ii), measured using the Symptom Assessment Scale (SAS).[46] Seven symptoms are each scored from 0 (not at all) to 10 (worst possible). Scores can be totalled, and caregiver proxies can complete responses. Adequate internal consistency reliability and test-retest reliability and concurrent validity have been demonstrated in older populations.[46, 47]

Demographic data collected for caregivers and care recipients at baseline are age, gender, country of birth, number of prescription medications taken by caregiver and care recipient's length of stay in hospital. Information about the type, duration, and amount of care provided by the caregiver, types of services received by the caregiver/care recipient and caregiver/care recipient health (number, type of health conditions) will also be collected.

### Procedure

The study procedure is summarised in **Table 2**. Participant dyads will be enrolled in the trial by the RAs within 24 hours of discharge from hospital. Baseline (timepoint 1) assessment, including demographic data collection, is completed during the first week after hospital discharge. Questionnaires are administered by phone by the RAs. Data collection at timepoints 2, 3, and 4 will be prompted by the project manager sending an alert to the RAs through the database and completed by phone for both intervention and control groups. This strategy ensures that FECH+ program completion occurs prior to timepoint 3 data collection and maintains the RAs blinding to group allocation.

**Table 2. Overview of procedure**

| Timepoint | Time After Discharge | Measurement tools administered |
|-----------|----------------------|--------------------------------|
|-----------|----------------------|--------------------------------|

---

|                               |          |                                                        |
|-------------------------------|----------|--------------------------------------------------------|
| T1 (baseline) data collection | 1-4 days | AQoL-8D*, CGI, PCS, FACQ, SAS, BADLI, Demographic data |
|-------------------------------|----------|--------------------------------------------------------|

***Intervention group only: FECH+ Nurse Contacts 1-4: one week, two weeks, 1 month, 2 months after discharge***

|                    |          |                                |
|--------------------|----------|--------------------------------|
| T2 data collection | 3 months | AQoL-8D, PCS, FACQ, SAS, BADLI |
|--------------------|----------|--------------------------------|

***Intervention group only: FECH+ Nurse Contacts 5-6: 4months, 6 months after discharge***

|                    |           |                                                                     |
|--------------------|-----------|---------------------------------------------------------------------|
| T3 data collection | 6 months  | AQoL-8D, CGI, PCS, FACQ, SAS, BADLI, Qualitative Interview (subset) |
| T4 data collection | 12 months | AQoL-8D, CGI, PCS, FACQ, SAS, BADLI, Qualitative Interview (subset) |

---

*Notes:* CGI= Caregiver Inventory, PCS= Preparedness for Caregiving Scale, FACQ= Family Appraisal of Caregiving Questionnaire- Palliative Care, SAS= Symptom Assessment Scale, BADLI= Barthel Activities of Daily Living Index

\*AQoL-8D measures health-related quality of life[36]

---

### **Statistical analysis plan**

Characteristics of the groups will be summarised using descriptive statistics (frequencies and percentages for categorical variables; means, standard deviations, medians and ranges for variables measured on a continuous scale). Differences in demographic and baseline health status variables between groups at baseline will be compared using Chi-square, t-tests or non-parametric Wilcoxon two-sample tests as appropriate. Changes from baseline in the AQoL-8D score for the caregiver will be calculated to each time point and tested for normality using the Shapiro-Wilk statistic; if not normally distributed, a Box-Cox transformation will be applied to the measure before further analysis. Comparison of the changes in AQoL-8D scores between control and intervention groups will be performed using a mixed regression

1  
2  
3 model with the caregiver group identified as a random effect. This model takes into account  
4 the correlation between repeated measurements on each individual. An interaction term  
5  
6 between time and group will be introduced into the model to test whether rates of change in  
7  
8 the outcome differ between groups. If differences between the groups are evident at baseline,  
9  
10 these will be included in the model as covariates so that adjustment can be made before  
11  
12 examining differences between groups in outcomes.  
13  
14  
15  
16  
17  
18

19 In our preliminary work[11] there was <20% missing data. Missing data will be managed  
20  
21 using multiple imputation methods informed by a sensitivity analysis to manage this, creating  
22  
23 25 or more data sets.[48] Two analyses will be performed, namely: an analysis using only the  
24  
25 observed data, and secondly, after missing value substitution, where necessary. Data will be  
26  
27 analysed using an intention-to-treat approach. Secondary outcomes will be analysed in a  
28  
29 similar manner to the primary outcome. Statistical analyses will be conducted using STATA  
30  
31 16 software (Stata Statistical Software, College Station, TX: StataCorp LLC). All hypothesis  
32  
33 tests will be 2-sided and p values of <.05 considered statistically significant.  
34  
35  
36  
37  
38  
39

#### 40 Sample size

41  
42 The primary outcome is the change in total score on the AQoL-8D[36] for the caregiver at 6  
43  
44 months post-discharge. A very small effect size of 0.06 has been described as being of  
45  
46 clinical importance.[49] However, we anticipate a larger effect size, based upon: a) our  
47  
48 assessment of changes in health, measured using the SF12[50] during our preliminary  
49  
50 study,[11] in which we obtained a positive change in physical health (0.17) and mental health  
51  
52 (0.22) from baseline until immediately post-intervention; b) that the AQoL-8D is a more  
53  
54 appropriate outcome measure as psychosocial components of health are emphasised more;  
55  
56 and c) that we are now implementing an expanded intervention with longer follow up.  
57  
58  
59  
60

1  
2  
3 Therefore, we designed this study with 80% power to detect an effect size of 0.22. This  
4 would require 648 caregiver dyads (324 in each of the control and intervention groups),  
5  
6 determined using the G\*Power sample size calculator.[51] We anticipate 30% attrition during  
7  
8 the 12-month post-discharge period so our recruitment target to address the primary outcome  
9  
10 variable is 925 dyads. Based upon preliminary work, this sample size will also allow 80%  
11  
12 power to detect meaningful differences in the secondary outcomes for caregiver  
13  
14 preparedness, strain and distress, and hospitalisation costs for patients.[11]  
15  
16  
17  
18  
19  
20  
21  
22

### 23 **Process evaluation**

24  
25 A process evaluation will assist in understanding the mechanism of the trial results. The  
26  
27 process evaluation uses the framework recommended by the Medical Research Council for  
28  
29 evaluating complex interventions.[52] Caregivers' and nurses' feedback on aspects of  
30  
31 program implementation will be evaluated. A purposive sample (estimated 25-40) of  
32  
33 caregivers from WA and QLD who have completed participation in the FECH+ program will  
34  
35 be selected immediately after program conclusion for inclusion in qualitative interviews.  
36  
37 Sample selection will ensure maximum variation (e.g., gender, age, relationship, caregiving  
38  
39 duration), until data saturation.[53] Qualitative, digital, audio-recorded and transcribed semi-  
40  
41 structured telephone interviews (estimated 10-20 minutes) will be scheduled at two time  
42  
43 points (at the end of the intervention and six months later) to explore how the FECH+  
44  
45 program has influenced caregiving and caregiver experiences during and after the program.  
46  
47 FECH+ nurses will also be asked to record their reflections on each FECH+ program contact.  
48  
49 This includes identifying barriers to, or facilitators of, the effectiveness of the FECH+  
50  
51 program.  
52  
53  
54  
55  
56  
57  
58  
59  
60

1  
2  
3 Program implementation will be examined by addressing fidelity, safety, adaptations, reach,  
4 and dose.[52] Data to be collected by the FECH+ nurses as they deliver the intervention  
5  
6  
7 include:

- 8  
9  
10 a) adherence to or deviation from planned FECH+ processes including any safety concerns and  
11 how addressed;  
12  
13 b) information provided to caregivers and the extent to which caregivers engaged with  
14 resources provided;  
15  
16  
17 c) time taken to implement processes, including duration and frequency of sessions.  
18  
19  
20  
21  
22  
23

24 Qualitative data will be analysed using thematic analysis.[53] Strategies to enhance the  
25 trustworthiness of findings will include verbatim transcriptions of audio-recorded interviews  
26 and an audit trail.[53] Quantitative data will be presented using the framework of the process  
27 evaluation and where appropriate triangulated with qualitative data to assist in clarifying  
28 complex causal pathways.[52]  
29  
30  
31  
32  
33  
34

### 35 36 37 **Economic analysis**

38 The economic analysis plan will be published separately. Briefly, cost effectiveness of the  
39 intervention (primary aim ii) will be measured using a within-trial cost-utility analysis. We  
40 shall evaluate the mean incremental cost and quality-adjusted life years (QALYs) according  
41 to the two randomized groups, taking an intention to treat perspective. A 12-month time  
42 horizon will be used, taking a health system perspective.  
43  
44  
45  
46  
47  
48  
49  
50  
51  
52

### 53 **Data Management**

54 Data management will be overseen by a data management committee comprising a  
55 representative from the CTDMC, the WA and Qld State Managers and trial leaders from WA  
56  
57  
58  
59  
60

1  
2  
3 (AMH) and QLD (WM). The committee will undertake regular monthly monitoring and  
4  
5 auditing of data entry procedures and guide all data management. Data security is primarily  
6  
7 addressed by the use of REDCap, an online application that provides for secure data entry,  
8  
9 storage, and transfer. (<https://www.project-redcap.org/>) The CTDMC administers REDCap  
10  
11 and all data are stored in WA. Administrative data (which include names and dates of birth)  
12  
13 that are accessed via the database for merging with the health data will be locked down prior  
14  
15 to creating a merged dataset and are only accessible to a CTDMC administrator. De-  
16  
17 identified datasets will be uploaded through the University's encrypted system and stored on  
18  
19 a password protected drive (at Curtin University). All data will be securely managed and  
20  
21 stored at Curtin University as per National Health and Medical Research Council Australia  
22  
23 guidelines, State data linkage services and Services Australia guidelines. Following the  
24  
25 completion of the study analyses, a de-identified dataset will be made available on reasonable  
26  
27 request after ongoing secondary analyses are conducted and pending ethics approval from  
28  
29 existing and requesting institutions and approval from all investigators.  
30  
31  
32  
33  
34  
35  
36  
37

### 38 **Trial Status**

39  
40 Recruitment commenced in August 2020 and is expected to be completed by approximately  
41  
42 April 2022 with final follow up occurring in April 2023. Primary data analyses will be  
43  
44 completed, followed by the process evaluation. Final health data linkage will be undertaken  
45  
46 in the 12 months after final follow up. Health economic analyses will then be completed.  
47  
48  
49  
50

### 51 **Trial Management**

52  
53 Any amendments required to the study will be agreed on by the trial management committee  
54  
55 consisting of all Chief Investigators (AMH, WM, RM, KH, NW, SS, CB, SA), and submitted  
56  
57 to all ethics committees for approval prior to being commenced. The trial management  
58  
59  
60

1  
2  
3 committee will monitor the trial in accordance with the currently approved protocol, which  
4 includes submitting annual ethics reports detailing trial progress and any adverse events to all  
5 ethics committees. Each of the named investigators on the grant shall be eligible to have  
6 authorship.  
7  
8  
9  
10  
11  
12  
13  
14

### 15 **Patient and Public Involvement**

16  
17 Two consumer advocates are members of the trial team. This study was developed with  
18 caregiver input from Carers WA and the WA Consumer and Community Health Research  
19 Network, prior to submitting the application for funding. The consumer input assisted to  
20 ensure the appropriateness of the intervention and study processes. This included assisting  
21 with wording of documents for the trial and aspects of procedure and intervention delivery.  
22  
23 The two consumer advocates are ongoing members of the trial team and continue to inform  
24 and give feedback about the study procedure. Both consumer organisations will contribute to  
25 the dissemination of results and future presentations and translation projects.  
26  
27  
28  
29  
30  
31  
32  
33  
34  
35  
36  
37  
38  
39  
40  
41  
42  
43  
44  
45  
46  
47  
48  
49  
50  
51  
52  
53  
54  
55  
56  
57  
58  
59  
60



## ETHICS AND DISSEMINATION

The study has been approved by hospitals (the Sir Charles Gairdner Osborne Park Health Care Group, Gold Coast Health Care Group) and universities (Curtin and Griffith) human research ethics committees. Approvals for linked health data for economic evaluation have been obtained from the Data Linkage Branches of WA Health, QLD Health, and Services Australia (for national health administered data). All caregivers will provide written, informed consent to participate in the trial. Care recipients will also provide written, informed consent to participate in the trial. Participant information and consent forms are provided as online supplementary files (**see Additional file 2**). Cognitive impairment may occur in a care recipient who forms part of the dyad. A waiver of consent has been approved in WA for these care recipients to be included in the study. If these care recipients are encountered in QLD, we will seek consent from the appropriate substitute decision-maker.

To disseminate findings, Carers WA and Carers QLD, (two peak organisations who provide carer advocacy and support) will be asked to publicise the study completion and findings on their website. Our consumer advocates will provide advice and assistance to maximise engagement strategies through established state and national consumer networks. Papers will be published in peer-reviewed journals, and abstracts submitted to relevant conferences. Practitioner and consumer forums will be held in participating hospitals and State health districts. Study participants will be provided with a summary of study findings upon request.

## ACKNOWLEDGEMENTS

Authors thank and acknowledge the contributions of Adjunct Associate Professor Christine Toye (Curtin University) who led the trial of the original FECH program, made a substantial contribution to the trial design, led the grant application to obtain the funding for the trial and completed ethics applications, and Dr Richard Parsons who contributed to the trial design, grant application and preparation of the statistical analysis plan.

## COMPETING INTERESTS

The authors have no conflicts to declare.

## AUTHORS CONTRIBUTION

AMH and WM led manuscript drafting. AMH is the lead investigator on the National Health and Medical Research Council of Australia grant and all authors are named applicants on the grant. AMH, WM, RM, KH, SS, CB, NW and SA contributed to trial design and will assist with monitoring trial procedure. AMH leads the trial with support from WM, LG and AK. CB, SS, SA, KH, LG, WM and AMH contribute to intervention design and delivery. MB and AMH lead the statistical analysis plan. AK and LG lead the management of the trial sites. MBr, CR, SM, (WA) TC and CJ (QLD) contribute to trial procedure, including management at the sites. RM leads the economic analyses. All authors provided critical evaluation and approval of the final submitted manuscript.

## FUNDING

This work is supported by a grant awarded by the National Health and Medical Research Council Australia (grant number APP1157834). Additional funding to support the research

1  
2  
3 has been provided by Curtin University. The funders have no role in the design of the study  
4  
5 and will not have any role in its execution, data management, analysis and interpretation, nor  
6  
7 the decision to submit results for publication. Anne-Marie Hill is supported by a National  
8  
9 Health and Medical Research Council (Australia) Career Development Award.  
10  
11  
12  
13  
14  
15  
16  
17  
18  
19  
20  
21  
22  
23  
24  
25  
26  
27  
28  
29  
30  
31  
32  
33  
34  
35  
36  
37  
38  
39  
40  
41  
42  
43  
44  
45  
46  
47  
48  
49  
50  
51  
52  
53  
54  
55  
56  
57  
58  
59  
60

For peer review only

## REFERENCES

1. Australian Bureau of Statistics. Disability, ageing and carers, Australia: summary of findings, 2018. Available: <https://www.abs.gov.au/ausstats/abs@.nsf/mf/4430.0>. Accessed 30th August 2020.
2. World Health Organisation. Ageing and health, 2018. Available: <https://www.who.int/news-room/fact-sheets/detail/ageing-and-health> Accessed 30th August 2020.
3. Ris I, Schnepf W, Mahrer, Imhof R. An integrative review on family caregivers' involvement in care of home-dwelling elderly. *Health Soc Care Community* 2019;27:e95-e111.doi:10.1111/hsc.12663.
4. Carers UK. State of Caring. A snapshot of unpaid care in the UK, 2019. Available: <https://www.carersuk.org/news-and-campaigns/state-of-caring-survey-2020>. Accessed 30th August 2020.
5. Carers NSW Australia. 40 Years of Carer Surveys (1976-2016), 2014. Available: <http://www.carersnsw.org.au/research/survey> Accessed 30th July 2020.
6. Butterworth P, Pymont C, Rodgers B, et al. Factors that explain the poorer mental health of caregivers: results from a community survey of older Australians. *Aust N Z J Psychiatry* 2010;44:616-24.doi:10.3109/00048671003620202.
7. Litzelman K, Skinner H, Gangnon R, et al. The relationship among caregiving characteristics, caregiver strain, and health-related quality of life: evidence from the survey of the health of Wisconsin. *Qual Life Res* 2015;24:1397-406.doi:10.1007/s11136-014-0874-6.
8. Bom J, Bakx P, Schut F, et al. The impact of informal caregiving for older adults on the health of various types of caregivers: a systematic review. *Gerontologist* 2019;59:e629–e642:doi.10.1093/geront/gny137.

- 1  
2  
3 9. Betini RSD, Hirdes JP, Lero DS, et al. A longitudinal study looking at and beyond care  
4 recipient health as a predictor of long term care home admission. *BMC Health Serv Res*  
5  
6 2017;17:709.doi:10.1186/s12913-017-2671-8.  
7  
8
- 9  
10 10. Lopez-Hartmann ML, Wens J, Verhoeven V, et al. The effect of caregiver support  
11 interventions for informal caregivers of community-dwelling frail elderly: systematic  
12 review. *Int J Integr Care* 2012;12:e133.doi:10.5334/ijic.845.  
13  
14
- 15 11. Toye C, Parsons R, Slatyer S, et al. Outcomes for family carers of a nurse-delivered  
16 hospital discharge intervention for older people (the Further Enabling Care at Home  
17 Program): single blind randomised controlled trial. *Int J Nurs Stud* 2016;64:32-  
18  
19 41.doi:10.1016/j.ijnurstu.2016.09.012.  
20  
21
- 22 12. Petrovic M, Gaggioli A. Digital mental health tools for caregivers of older adults-a  
23 scoping review. *Front Public Health* 2020;8:128.doi:10.3389/fpubh.2020.00128.  
24  
25
- 26 13. Hendrix CC, Matters D, Griffin T, et al. Academic-practice partnership for caregiver  
27 training and support: the Duke elder family/caregiver training (DEFT) center. *N C Med J*  
28  
29 2020;81:221-7.doi:10.18043/ncm.81.4.221.  
30  
31
- 32 14. Pritchard E, Cussen A, Delafosse V, et al. Interventions supporting caregiver readiness  
33 when caring for patients with dementia following discharge home: a mixed-methods  
34 systematic review. *Australas J Ageing* n/a(n/a).doi:10.1111/ajag.12765.  
35  
36
- 37 15. Smith TO, Pearson M, Pfeiffer K, et al. Caregiver interventions for adults discharged  
38 from the hospital: systematic review and meta-analysis. *J Amer Geriatr Soc*  
39  
40 2019;67:1960-9.doi:10.1111/jgs.16048.  
41  
42
- 43 16. Corry M, Neenan K, Brabyn S, et al. Telephone interventions, delivered by healthcare  
44 professionals, for providing education and psychosocial support for informal caregivers  
45 of adults with diagnosed illnesses. *Cochrane Database Syst Rev*  
46  
47 2019.doi:10.1002/14651858.  
48  
49  
50  
51  
52  
53  
54  
55  
56  
57  
58  
59  
60

- 1  
2  
3 17. Hill AM, Etherton-Beer C, McPhail S, et al. (2019). Falls after hospital discharge: a  
4 randomised clinical trial of individualised multi-modal falls prevention education. *J*  
5  
6 *Gerontol A Biol Sci Med Sci* 2019;74:1511-1517.doi:10.1093/gerona/glz026.  
7  
8  
9  
10 18. Gill TM, Gahbauer EA, Murphy TE, et al. Risk factors and precipitants of long-term  
11 disability in community mobility: a cohort study of older persons. *Ann Intern Med*  
12 2012;156:131-40.doi:10.1059/0003-4819-156-2-201201170-00009.  
13  
14  
15  
16 19. Jencks SF, Williams MV, Coleman EA. Rehospitalizations among patients in the  
17 Medicare fee-for-service program. *N Engl J Med* 2009;360;14:1418-  
18 28.doi:10.1056/NEJMsa0803563.  
19  
20  
21  
22 20. Hestevik CH, Molin M, Debesay J, et al. Older patients' and their family caregivers'  
23 perceptions of food, meals and nutritional care in the transition between hospital and  
24 home care: a qualitative study. *BMC Nutrit* 2020;6:11.doi:10.1186/s40795-020-00335-w.  
25  
26  
27  
28 21. Greysen SR, Harrison JD, Kripalani S, et al. Understanding patient-centred readmission  
29 factors: a multi-site, mixed-methods study. *BMJ Qual Saf* 2017;26:33-  
30 41.doi:10.1136/bmjqs-2015-004570.  
31  
32  
33  
34 22. Lilleheie I, Debesay J, Bye A, et al. The tension between carrying a burden and feeling  
35 like a burden: a qualitative study of informal caregivers' and care recipients' experiences  
36 after patient discharge from hospital. *Int J Qual Stud Health Well-being*  
37 2021;16:1855751.doi:10.1080/17482631.2020.1855751.  
38  
39  
40  
41 23. Allen Watts K, Malone E, Dionne-Odom JN, et al. Can you hear me now?: improving  
42 palliative care access through telehealth. *Res Nurs Health* 2021;44:226-  
43 37.doi:10.1002/nur.22105.  
44  
45  
46  
47 24. Wilz G, Soellner R. Evaluation of a short-term telephone-based cognitive behavioral  
48 intervention for dementia family caregivers. *Clin Gerontol* 2016;39:25-  
49 47.doi:10.1080/07317115.2015.1101631.  
50  
51  
52  
53  
54  
55  
56  
57  
58  
59  
60

- 1  
2  
3 25. Bakas T, McCarthy MJ, Israel J, et al. Adapting the telephone assessment and skill-  
4 building kit to the telehealth technology preferences of stroke family caregivers. *Res Nurs*  
5 *Health* 2021;44:81-91.doi:10.1002/nur.22075.  
6  
7  
8  
9  
10 26. Waller A, Dilworth S, Mansfield E, et al. Computer and telephone delivered interventions  
11 to support caregivers of people with dementia: a systematic review of research output and  
12 quality. *BMC geriatrics* 2017;17:265.doi:10.1186/s12877-017-0654-6.  
13  
14  
15  
16  
17 27. Aoun SM, Stegmann R, Slatyer S, et al. Hospital postdischarge intervention trialled with  
18 family caregivers of older people in Western Australia: potential translation into practice.  
19 *BMJ Open* 2018;8:e022747.doi:10.1136/bmjopen-2018-022747.  
20  
21  
22  
23  
24 28. Australian Commission on Safety and Quality in Health Care. Patient reported outcome  
25 measures 2021. [https://www.safetyandquality.gov.au/our-work/indicators-measurement-](https://www.safetyandquality.gov.au/our-work/indicators-measurement-and-reporting/patient-reported-outcome-measures)  
26 [and-reporting/patient-reported-outcome-measures](https://www.safetyandquality.gov.au/our-work/indicators-measurement-and-reporting/patient-reported-outcome-measures). Accessed 10th April 2021.  
27  
28  
29  
30  
31 29. Moher D, Hopewell S, Schulz KF, et al. CONSORT 2010 explanation and elaboration:  
32 updated guidelines for reporting parallel group randomised trials. *J Clinical Epidemiol*  
33 2010;63:e1-37.doi:10.1016/j.jclinepi.2010.03.004.  
34  
35  
36  
37  
38 30. Chan A-W, Tetzlaff JM, Altman DG, et al. SPIRIT 2013 statement: defining standard  
39 protocol items for clinical trials. *Ann Intern Med* 2013;158:200-7.doi:10.7326/0003-4819-  
40 158-3-201302050-00583.  
41  
42  
43  
44  
45 31. Aggar C, Ronaldson S, Cameron ID. Self-esteem in carers of frail older people:  
46 resentment predicts anxiety and depression. *Aging Ment Health* 2011;15:671-  
47 8.doi:10.1080/13607863.2011.562176.  
48  
49  
50  
51  
52 32. Hoffmann TC, Glasziou PP, Boutron I, et al. Better reporting of interventions: template  
53 for intervention description and replication (TIDieR) checklist and guide. *BMJ*  
54 2014;348:g1687.doi:10.1136/bmj.g1687.  
55  
56  
57  
58  
59  
60

- 1  
2  
3 33. Ewing G, Austin L, Diffin J, et al. Developing a person-centered approach to carer  
4 assessment and support. *Br J Community Nurs* 2015;20:580-  
5  
6 4.doi:10.12968/bjcn.2015.20.12.580.  
7  
8  
9  
10 34. Malouff JM, Thorsteinsson EB, Schutte NS. The efficacy of problem solving therapy in  
11 reducing mental and physical health problems: a meta-analysis. *Clin Psychol Rev*  
12 2007;27:46-57.doi:10.1016/j.cpr.2005.12.005.  
13  
14  
15  
16  
17 35. The Carer Support Needs Assessment: a toolkit for practitioners. Carer Support Needs  
18 Assessment Tool (CSNAT), 2015. Available: <http://csnat.org/> Accessed 30th August  
19 2020.  
20  
21  
22  
23  
24 36. Richardson J, Iezzi A, Khan MA. Validity and reliability of the Assessment of Quality of  
25 Life (AQoL-8D) multi-attribute utility instrument. *Patient* 2014;7:85-  
26  
27 96.doi:10.1007/s40271-013-0036-x.  
28  
29  
30  
31 37. Richardson J, Khan MA, Iezzi A, et al. Comparing and explaining differences in the  
32 magnitude, content, and sensitivity of utilities predicted by the EQ-5D, SF-6D, HUI 3,  
33 15D, QWB, and AQoL-8D multi-attribute utility instruments. *Med Decis Making*  
34 2014;35:276-91.doi:10.1177/0272989x14543107  
35  
36  
37  
38  
39  
40 38. Richardson J, Iezzi A, Khan MA. Why do multi-attribute utility instruments produce  
41 different utilities: the relative importance of the descriptive systems, scale and 'micro-  
42 utility' effects. *Quality of life research: Qual Life Res* 2015;24:2045-  
43  
44 53.doi:10.1007/s11136-015-0926-6  
45  
46  
47  
48  
49 39. Maxwell A, Ozmen M, Iezzi A, et al. Deriving population norms for the AQoL-6D and  
50 AQoL-8D multi-attribute utility instruments from web-based data. *Qual Life Res*  
51 2016;25:3209-19.doi:10.1007/s11136-016-1337-z.  
52  
53  
54  
55  
56 40. Archbold PG, Stewart BJ, Greenlick MR, et al. Mutuality and preparedness as predictors  
57 of caregiver role strain. *Res Nurs Health* 1990;13:375-84.doi:10.1002/nur.4770130605.  
58  
59  
60



- 1  
2  
3 41. Schumacher K, Stewart BJ, Archbold PG, et al. Effects of caregiving demand, mutuality,  
4 and preparedness on family caregiver outcomes during cancer treatment. *Oncol Nurs*  
5 *Forum* 2008;35:49-56.doi:10.1188/08.Onf.49-56.  
6  
7  
8  
9  
10 42. Henriksson A, Andershed B, Benzein E, et al. Adaptation and psychometric evaluation of  
11 the preparedness for caregiving scale, caregiver competence scale and rewards of  
12 caregiving scale in a sample of Swedish family members of patients with life-threatening  
13 illness. *Palliat Med* 2012;26:930-8.doi:10.1177/0269216311419987.  
14  
15  
16  
17  
18  
19 43. Merluzzi TV, Philip EJ, Vachon DO, et al. Assessment of self-efficacy for caregiving: the  
20 critical role of self-care in caregiver stress and burden. *Palliat Support Care* 2011;9:15-  
21 24.doi:10.1017/s1478951510000507.  
22  
23  
24  
25  
26 44. Cooper B, Kinsella GJ, Picton C. Development and initial validation of a family appraisal  
27 of caregiving questionnaire for palliative care. *Psychooncology* 2006;15:613-  
28 22.doi:10.1002/pon.1001.  
29  
30  
31  
32  
33 45. Mahoney FI, Barthel DW. Functional evaluation: the Barthel index. *Md State Med J*  
34 1965;14:61-5.  
35  
36  
37  
38 46. Aoun S, Monterosso L, Kristjanson L, et al. Measuring symptom distress in palliative  
39 care: psychometric properties of the symptom assessment scale. *J Palliat Med*  
40 2011;14:315-21.doi:10.1089/jpm.2010.0412.  
41  
42  
43  
44 47. Toye C, Walker H, Kristjanson LJ, et al. Measuring symptom distress among frail elders  
45 capable of providing self-reports. *Nurs Health Sci* 2005;7:184-91.doi:10.1111/j.1442-  
46 2018.2005.00231.x.  
47  
48  
49  
50  
51 48. Sterne JAC, White IR, Carlin JB, et al. Multiple imputation for missing data in  
52 epidemiological and clinical research: potential and pitfalls. *BMJ*  
53 2009;338:2393.doi:10.1136/bmj.b2393.  
54  
55  
56  
57  
58  
59  
60

- 1  
2  
3 49. Hawthorne G, Osborne R. Population norms and meaningful differences for the  
4  
5 Assessment of Quality of Life (AQoL) measure. *Aust N Z J Public Health* 2005;29:136-  
6  
7 42.doi:10.1111/j.1467-842x.2005.tb00063.x.  
8  
9  
10 50. Health Assessment. Lab Medical Outcomes Trust Quality Metric SF12v2 Health Survey.  
11  
12 2003.  
13  
14 51. Faul F, Erdfelder E, Buchner A, et al. Statistical power analyses using G\*Power 3.1: tests  
15  
16 for correlation and regression analyses. *Behav Res Methods* 2009;41:1149-60.  
17  
18 doi:10.3758/BRM.41.4.1149.  
19  
20 52. Moore G, Audrey S, Barker M, et al. Process evaluation of complex interventions:  
21  
22 medical research council guidance. *BMJ* 2015;350.doi:10.1136/bmj.h1258.  
23  
24 53. Braun V, Clarke V. Successful qualitative research; a practical guide for beginners.  
25  
26 London: Sage Publications; 2013.  
27  
28  
29  
30  
31  
32  
33  
34  
35  
36  
37  
38  
39  
40  
41  
42  
43  
44  
45  
46  
47  
48  
49  
50  
51  
52  
53  
54  
55  
56  
57  
58  
59  
60

1  
2  
3 **FIGURE LEGENDS**  
4

5 **Figure 1.** Participant flow through the study  
6  
7  
8  
9  
10  
11  
12  
13  
14  
15  
16  
17  
18  
19  
20  
21  
22  
23  
24  
25  
26  
27  
28  
29  
30  
31  
32  
33  
34  
35  
36  
37  
38  
39  
40  
41  
42  
43  
44  
45  
46  
47  
48  
49  
50  
51  
52  
53  
54  
55  
56  
57  
58  
59  
60

For peer review only

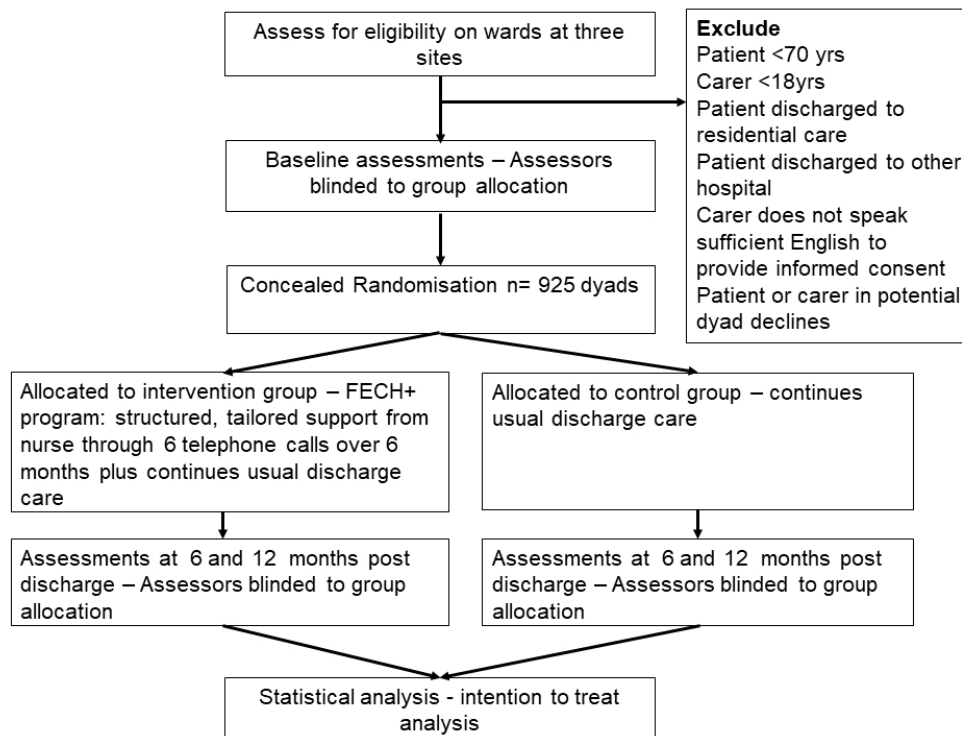

Figure 1. Participant flow through the study

81x60mm (300 x 300 DPI)

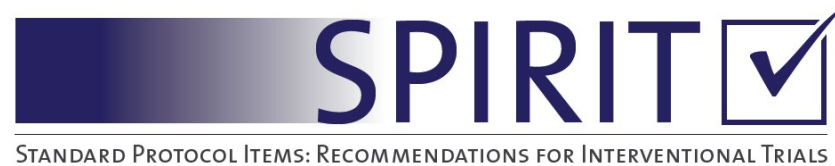

**Hill et al, 2020: Evaluating the provision of Further Enabling Care at Home (FECH+) for informal caregivers of older adults discharged home from hospital – protocol for a multicentre randomised controlled trial**

SPIRIT 2013 Checklist: Recommended items to address in a clinical trial protocol and related documents\*

| Section/item                      | Item No | Description                                                                                                  | Addressed on page number                                        |
|-----------------------------------|---------|--------------------------------------------------------------------------------------------------------------|-----------------------------------------------------------------|
| <b>Administrative information</b> |         |                                                                                                              |                                                                 |
| Title                             | 1       | Descriptive title identifying the study design, population, interventions, and, if applicable, trial acronym | 1                                                               |
| Trial registration                | 2a      | Trial identifier and registry name. If not yet registered, name of intended registry                         | 4                                                               |
|                                   | 2b      | All items from the World Health Organization Trial Registration Data Set                                     | Yes - see ANZCTR trial registry page link in manuscript page 10 |
| Protocol version                  | 3       | Date and version identifier                                                                                  | Published version is final                                      |
| Funding                           | 4       | Sources and types of financial, material, and other support                                                  | 25 – Funding statement                                          |
| Roles and responsibilities        | 5a      | Names, affiliations, and roles of protocol contributors                                                      | Title page and page 25                                          |

|    |                                                           |                                                                                                                                                                                                                                                                                          |                                                                                                                                                                                                           |
|----|-----------------------------------------------------------|------------------------------------------------------------------------------------------------------------------------------------------------------------------------------------------------------------------------------------------------------------------------------------------|-----------------------------------------------------------------------------------------------------------------------------------------------------------------------------------------------------------|
| 1  | 5b                                                        | Name and contact information for the trial sponsor                                                                                                                                                                                                                                       | 25 –Funding statement                                                                                                                                                                                     |
| 2  |                                                           |                                                                                                                                                                                                                                                                                          |                                                                                                                                                                                                           |
| 3  |                                                           |                                                                                                                                                                                                                                                                                          |                                                                                                                                                                                                           |
| 4  | 5c                                                        | Role of study sponsor and funders, if any, in study design; collection, management, analysis, and interpretation of data; writing of the report; and the decision to submit the report for publication, including whether they will have ultimate authority over any of these activities | 25 – Funding statement                                                                                                                                                                                    |
| 5  |                                                           |                                                                                                                                                                                                                                                                                          |                                                                                                                                                                                                           |
| 6  |                                                           |                                                                                                                                                                                                                                                                                          |                                                                                                                                                                                                           |
| 7  |                                                           |                                                                                                                                                                                                                                                                                          |                                                                                                                                                                                                           |
| 8  | 5d                                                        | Composition, roles, and responsibilities of the coordinating centre, steering committee, endpoint adjudication committee, data management team, and other individuals or groups overseeing the trial, if applicable (see Item 21a for data monitoring committee)                         | 22-23                                                                                                                                                                                                     |
| 9  |                                                           |                                                                                                                                                                                                                                                                                          |                                                                                                                                                                                                           |
| 10 |                                                           |                                                                                                                                                                                                                                                                                          |                                                                                                                                                                                                           |
| 11 |                                                           |                                                                                                                                                                                                                                                                                          |                                                                                                                                                                                                           |
| 12 |                                                           |                                                                                                                                                                                                                                                                                          |                                                                                                                                                                                                           |
| 13 |                                                           |                                                                                                                                                                                                                                                                                          |                                                                                                                                                                                                           |
| 14 |                                                           |                                                                                                                                                                                                                                                                                          |                                                                                                                                                                                                           |
| 15 | <b>Introduction</b>                                       |                                                                                                                                                                                                                                                                                          |                                                                                                                                                                                                           |
| 16 |                                                           |                                                                                                                                                                                                                                                                                          |                                                                                                                                                                                                           |
| 17 | Background and rationale                                  | 6a                                                                                                                                                                                                                                                                                       | Description of research question and justification for undertaking the trial, including summary of relevant studies (published and unpublished) examining benefits and harms for each intervention        |
| 18 |                                                           |                                                                                                                                                                                                                                                                                          | 6 -8                                                                                                                                                                                                      |
| 19 |                                                           |                                                                                                                                                                                                                                                                                          |                                                                                                                                                                                                           |
| 20 |                                                           | 6b                                                                                                                                                                                                                                                                                       | Explanation for choice of comparators                                                                                                                                                                     |
| 21 |                                                           |                                                                                                                                                                                                                                                                                          | N/A                                                                                                                                                                                                       |
| 22 | Objectives                                                | 7                                                                                                                                                                                                                                                                                        | Specific objectives or hypotheses                                                                                                                                                                         |
| 23 |                                                           |                                                                                                                                                                                                                                                                                          | 8                                                                                                                                                                                                         |
| 24 | Trial design                                              | 8                                                                                                                                                                                                                                                                                        | Description of trial design including type of trial (eg, parallel group, crossover, factorial, single group), allocation ratio, and framework (eg, superiority, equivalence, noninferiority, exploratory) |
| 25 |                                                           |                                                                                                                                                                                                                                                                                          | 10                                                                                                                                                                                                        |
| 26 |                                                           |                                                                                                                                                                                                                                                                                          |                                                                                                                                                                                                           |
| 27 |                                                           |                                                                                                                                                                                                                                                                                          |                                                                                                                                                                                                           |
| 28 | <b>Methods: Participants, interventions, and outcomes</b> |                                                                                                                                                                                                                                                                                          |                                                                                                                                                                                                           |
| 29 |                                                           |                                                                                                                                                                                                                                                                                          |                                                                                                                                                                                                           |
| 30 | Study setting                                             | 9                                                                                                                                                                                                                                                                                        | Description of study settings (eg, community clinic, academic hospital) and list of countries where data will be collected. Reference to where list of study sites can be obtained                        |
| 31 |                                                           |                                                                                                                                                                                                                                                                                          | 11                                                                                                                                                                                                        |
| 32 |                                                           |                                                                                                                                                                                                                                                                                          |                                                                                                                                                                                                           |
| 33 | Eligibility criteria                                      | 10                                                                                                                                                                                                                                                                                       | Inclusion and exclusion criteria for participants. If applicable, eligibility criteria for study centres and individuals who will perform the interventions (eg, surgeons, psychotherapists)              |
| 34 |                                                           |                                                                                                                                                                                                                                                                                          | 10                                                                                                                                                                                                        |
| 35 |                                                           |                                                                                                                                                                                                                                                                                          |                                                                                                                                                                                                           |
| 36 | Interventions                                             | 11a                                                                                                                                                                                                                                                                                      | Interventions for each group with sufficient detail to allow replication, including how and when they will be administered                                                                                |
| 37 |                                                           |                                                                                                                                                                                                                                                                                          | 12, 15, Table 1                                                                                                                                                                                           |
| 38 |                                                           |                                                                                                                                                                                                                                                                                          |                                                                                                                                                                                                           |
| 39 |                                                           |                                                                                                                                                                                                                                                                                          |                                                                                                                                                                                                           |
| 40 |                                                           |                                                                                                                                                                                                                                                                                          |                                                                                                                                                                                                           |
| 41 |                                                           |                                                                                                                                                                                                                                                                                          |                                                                                                                                                                                                           |
| 42 |                                                           |                                                                                                                                                                                                                                                                                          |                                                                                                                                                                                                           |
| 43 |                                                           |                                                                                                                                                                                                                                                                                          |                                                                                                                                                                                                           |
| 44 |                                                           |                                                                                                                                                                                                                                                                                          |                                                                                                                                                                                                           |
| 45 |                                                           |                                                                                                                                                                                                                                                                                          |                                                                                                                                                                                                           |
| 46 |                                                           |                                                                                                                                                                                                                                                                                          |                                                                                                                                                                                                           |

|                                                                     |     |                                                                                                                                                                                                                                                                                                                                                                                |                                                       |
|---------------------------------------------------------------------|-----|--------------------------------------------------------------------------------------------------------------------------------------------------------------------------------------------------------------------------------------------------------------------------------------------------------------------------------------------------------------------------------|-------------------------------------------------------|
|                                                                     | 11b | Criteria for discontinuing or modifying allocated interventions for a given trial participant (eg, drug dose change in response to harms, participant request, or improving/worsening disease)                                                                                                                                                                                 | Refer protocol ANZCTR online registry link on page 10 |
|                                                                     | 11c | Strategies to improve adherence to intervention protocols, and any procedures for monitoring adherence (eg, drug tablet return, laboratory tests)                                                                                                                                                                                                                              |                                                       |
|                                                                     | 11d | Relevant concomitant care and interventions that are permitted or prohibited during the trial                                                                                                                                                                                                                                                                                  | N/A                                                   |
| Outcomes                                                            | 12  | Primary, secondary, and other outcomes, including the specific measurement variable (eg, systolic blood pressure), analysis metric (eg, change from baseline, final value, time to event), method of aggregation (eg, median, proportion), and time point for each outcome. Explanation of the clinical relevance of chosen efficacy and harm outcomes is strongly recommended | 16                                                    |
| Participant timeline                                                | 13  | Time schedule of enrolment, interventions (including any run-ins and washouts), assessments, and visits for participants. A schematic diagram is highly recommended (see Figure)                                                                                                                                                                                               | Table 2 – p 18                                        |
| Sample size                                                         | 14  | Estimated number of participants needed to achieve study objectives and how it was determined, including clinical and statistical assumptions supporting any sample size calculations                                                                                                                                                                                          | 19                                                    |
| Recruitment                                                         | 15  | Strategies for achieving adequate participant enrolment to reach target sample size                                                                                                                                                                                                                                                                                            | 19                                                    |
| <b>Methods: Assignment of interventions (for controlled trials)</b> |     |                                                                                                                                                                                                                                                                                                                                                                                |                                                       |
| Allocation:                                                         |     |                                                                                                                                                                                                                                                                                                                                                                                |                                                       |
| Sequence generation                                                 | 16a | Method of generating the allocation sequence (eg, computer-generated random numbers), and list of any factors for stratification. To reduce predictability of a random sequence, details of any planned restriction (eg, blocking) should be provided in a separate document that is unavailable to those who enrol participants or assign interventions                       | 11                                                    |
| Allocation concealment mechanism                                    | 16b | Mechanism of implementing the allocation sequence (eg, central telephone; sequentially numbered, opaque, sealed envelopes), describing any steps to conceal the sequence until interventions are assigned                                                                                                                                                                      | 11                                                    |

|    |                                                           |     |                                                                                                                                                                                                                                                                                                                                                                                                              |        |
|----|-----------------------------------------------------------|-----|--------------------------------------------------------------------------------------------------------------------------------------------------------------------------------------------------------------------------------------------------------------------------------------------------------------------------------------------------------------------------------------------------------------|--------|
| 1  | Implementation                                            | 16c | Who will generate the allocation sequence, who will enrol participants, and who will assign participants to interventions                                                                                                                                                                                                                                                                                    | 11-12  |
| 2  |                                                           |     |                                                                                                                                                                                                                                                                                                                                                                                                              |        |
| 3  |                                                           |     |                                                                                                                                                                                                                                                                                                                                                                                                              |        |
| 4  | Blinding (masking)                                        | 17a | Who will be blinded after assignment to interventions (eg, trial participants, care providers, outcome assessors, data analysts), and how                                                                                                                                                                                                                                                                    | 11-12  |
| 5  |                                                           |     |                                                                                                                                                                                                                                                                                                                                                                                                              |        |
| 6  |                                                           |     |                                                                                                                                                                                                                                                                                                                                                                                                              |        |
| 7  |                                                           | 17b | If blinded, circumstances under which unblinding is permissible, and procedure for revealing a participant's allocated intervention during the trial                                                                                                                                                                                                                                                         | n/a    |
| 8  |                                                           |     |                                                                                                                                                                                                                                                                                                                                                                                                              |        |
| 9  |                                                           |     |                                                                                                                                                                                                                                                                                                                                                                                                              |        |
| 10 | <b>Methods: Data collection, management, and analysis</b> |     |                                                                                                                                                                                                                                                                                                                                                                                                              |        |
| 11 |                                                           |     |                                                                                                                                                                                                                                                                                                                                                                                                              |        |
| 12 |                                                           |     |                                                                                                                                                                                                                                                                                                                                                                                                              |        |
| 13 | Data collection methods                                   | 18a | Plans for assessment and collection of outcome, baseline, and other trial data, including any related processes to promote data quality (eg, duplicate measurements, training of assessors) and a description of study instruments (eg, questionnaires, laboratory tests) along with their reliability and validity, if known. Reference to where data collection forms can be found, if not in the protocol | 16-17, |
| 14 |                                                           |     |                                                                                                                                                                                                                                                                                                                                                                                                              |        |
| 15 |                                                           |     |                                                                                                                                                                                                                                                                                                                                                                                                              |        |
| 16 |                                                           |     |                                                                                                                                                                                                                                                                                                                                                                                                              |        |
| 17 |                                                           |     |                                                                                                                                                                                                                                                                                                                                                                                                              |        |
| 18 |                                                           |     |                                                                                                                                                                                                                                                                                                                                                                                                              |        |
| 19 |                                                           | 18b | Plans to promote participant retention and complete follow-up, including list of any outcome data to be collected for participants who discontinue or deviate from intervention protocols                                                                                                                                                                                                                    | 21     |
| 20 |                                                           |     |                                                                                                                                                                                                                                                                                                                                                                                                              |        |
| 21 |                                                           |     |                                                                                                                                                                                                                                                                                                                                                                                                              |        |
| 22 | Data management                                           | 19  | Plans for data entry, coding, security, and storage, including any related processes to promote data quality (eg, double data entry; range checks for data values). Reference to where details of data management procedures can be found, if not in the protocol                                                                                                                                            | 22     |
| 23 |                                                           |     |                                                                                                                                                                                                                                                                                                                                                                                                              |        |
| 24 |                                                           |     |                                                                                                                                                                                                                                                                                                                                                                                                              |        |
| 25 |                                                           |     |                                                                                                                                                                                                                                                                                                                                                                                                              |        |
| 26 |                                                           |     |                                                                                                                                                                                                                                                                                                                                                                                                              |        |
| 27 | Statistical methods                                       | 20a | Statistical methods for analysing primary and secondary outcomes. Reference to where other details of the statistical analysis plan can be found, if not in the protocol                                                                                                                                                                                                                                     | 19     |
| 28 |                                                           |     |                                                                                                                                                                                                                                                                                                                                                                                                              |        |
| 29 |                                                           |     |                                                                                                                                                                                                                                                                                                                                                                                                              |        |
| 30 |                                                           | 20b | Methods for any additional analyses (eg, subgroup and adjusted analyses)                                                                                                                                                                                                                                                                                                                                     | 19     |
| 31 |                                                           |     |                                                                                                                                                                                                                                                                                                                                                                                                              |        |
| 32 |                                                           | 20c | Definition of analysis population relating to protocol non-adherence (eg, as randomised analysis), and any statistical methods to handle missing data (eg, multiple imputation)                                                                                                                                                                                                                              | 19     |
| 33 |                                                           |     |                                                                                                                                                                                                                                                                                                                                                                                                              |        |
| 34 |                                                           |     |                                                                                                                                                                                                                                                                                                                                                                                                              |        |
| 35 | <b>Methods: Monitoring</b>                                |     |                                                                                                                                                                                                                                                                                                                                                                                                              |        |
| 36 |                                                           |     |                                                                                                                                                                                                                                                                                                                                                                                                              |        |
| 37 |                                                           |     |                                                                                                                                                                                                                                                                                                                                                                                                              |        |
| 38 | Data monitoring                                           | 21a | Composition of data monitoring committee (DMC); summary of its role and reporting structure; statement of whether it is independent from the sponsor and competing interests; and reference to where further details about its charter can be found, if not in the protocol. Alternatively, an explanation of why a DMC is not needed                                                                        | 22     |
| 39 |                                                           |     |                                                                                                                                                                                                                                                                                                                                                                                                              |        |
| 40 |                                                           |     |                                                                                                                                                                                                                                                                                                                                                                                                              |        |
| 41 |                                                           |     |                                                                                                                                                                                                                                                                                                                                                                                                              |        |
| 42 |                                                           |     |                                                                                                                                                                                                                                                                                                                                                                                                              |        |



|                                 |     |                                                                                                                                                                                                                                  |        |
|---------------------------------|-----|----------------------------------------------------------------------------------------------------------------------------------------------------------------------------------------------------------------------------------|--------|
|                                 | 21b | Description of any interim analyses and stopping guidelines, including who will have access to these interim results and make the final decision to terminate the trial                                                          | n/a    |
| Harms                           | 22  | Plans for collecting, assessing, reporting, and managing solicited and spontaneously reported adverse events and other unintended effects of trial interventions or trial conduct                                                | 23     |
| Auditing                        | 23  | Frequency and procedures for auditing trial conduct, if any, and whether the process will be independent from investigators and the sponsor                                                                                      | 23     |
| <b>Ethics and dissemination</b> |     |                                                                                                                                                                                                                                  |        |
| Research ethics approval        | 24  | Plans for seeking research ethics committee/institutional review board (REC/IRB) approval                                                                                                                                        | 24     |
| Protocol amendments             | 25  | Plans for communicating important protocol modifications (eg, changes to eligibility criteria, outcomes, analyses) to relevant parties (eg, investigators, REC/IRBs, trial participants, trial registries, journals, regulators) | 23     |
| Consent or assent               | 26a | Who will obtain informed consent or assent from potential trial participants or authorised surrogates, and how (see Item 32)                                                                                                     | 11, 17 |
|                                 | 26b | Additional consent provisions for collection and use of participant data and biological specimens in ancillary studies, if applicable                                                                                            | 22     |
| Confidentiality                 | 27  | How personal information about potential and enrolled participants will be collected, shared, and maintained in order to protect confidentiality before, during, and after the trial                                             | 22     |
| Declaration of interests        | 28  | Financial and other competing interests for principal investigators for the overall trial and each study site                                                                                                                    | 25     |
| Access to data                  | 29  | Statement of who will have access to the final trial dataset, and disclosure of contractual agreements that limit such access for investigators                                                                                  | n/a    |
| Ancillary and post-trial care   | 30  | Provisions, if any, for ancillary and post-trial care, and for compensation to those who suffer harm from trial participation                                                                                                    | n/a    |

|                      |                            |     |                                                                                                                                                                                                                                                                                     |                      |
|----------------------|----------------------------|-----|-------------------------------------------------------------------------------------------------------------------------------------------------------------------------------------------------------------------------------------------------------------------------------------|----------------------|
| 1<br>2<br>3<br>4     | Dissemination policy       | 31a | Plans for investigators and sponsor to communicate trial results to participants, healthcare professionals, the public, and other relevant groups (eg, via publication, reporting in results databases, or other data sharing arrangements), including any publication restrictions | 24                   |
| 5<br>6               |                            | 31b | Authorship eligibility guidelines and any intended use of professional writers                                                                                                                                                                                                      | 23                   |
| 7<br>8               |                            | 31c | Plans, if any, for granting public access to the full protocol, participant-level dataset, and statistical code                                                                                                                                                                     | 21                   |
| 9<br>10              | <b>Appendices</b>          |     |                                                                                                                                                                                                                                                                                     |                      |
| 11<br>12<br>13<br>14 | Informed consent materials | 32  | Model consent form and other related documentation given to participants and authorised surrogates                                                                                                                                                                                  | Available on request |
| 15<br>16<br>17       | Biological specimens       | 33  | Plans for collection, laboratory evaluation, and storage of biological specimens for genetic or molecular analysis in the current trial and for future use in ancillary studies, if applicable                                                                                      | n/a                  |

\*It is strongly recommended that this checklist be read in conjunction with the SPIRIT 2013 Explanation & Elaboration for important clarification on the items. Amendments to the protocol should be tracked and dated. The SPIRIT checklist is copyrighted by the SPIRIT Group under the Creative Commons [“Attribution-NonCommercial-NoDerivs 3.0 Unported”](https://creativecommons.org/licenses/by-nc-nd/3.0/) license.

## **PARTICIPANT INFORMATION SUMMARY FOR CARERS**

You are invited to take part in a research project evaluating the Further Enabling Care at Home (FECH) program. This summary provides a brief explanation. Detailed information is in the following pages.

### **What is this project about?**

Family members or friends who provide regular, unpaid, ongoing physical and/or emotional care for an older person living at home are sometimes called 'carers'. This project tests a program designed to support such carers after the older person receiving care goes home from hospital.

### **Do I have to take part in the research project?**

You don't have to take part if you don't want to. If you do decide to take part, you can change your mind and withdraw from the study.

### **Who is involved in this project?**

The study is being conducted by a team of researchers led by Curtin University in Western Australia (WA) and Griffith University in Queensland (Qld). Hospitals involved are Sir Charles Gairdner Hospital in WA, Gold Coast University Hospital and Robina Hospital in Qld.

### **Why am I being invited to participate?**

You are invited to take part as a carer of a patient aged 70 years or older who is being discharged home from one of the included hospitals. The patient will not be included in the study unless you agree to take part as well. If you both take part, information for the study will be collected from you about yourself and about the health, care, and support needs of the person for whom you provide care.

### **What will I have to do?**

- Answer initial questions over the phone about yourself and the patient (for about 30 minutes).
- Complete questionnaires (by phone or online) soon after you join the study then 3, 6, and 12 months later, taking 20-30 minutes each time.
- Allow us to access routinely collected information about your use of health services, such as your visits to a GP or a hospital, and your use of prescription medicines.
- You will have a 1 in 2 chance (like tossing a coin) of being included in the FECH program. If you do receive this program, which is additional to usual post-discharge support, you will be telephoned by a nurse 6 times over 6 months. The first call will last about 15 minutes, the second about 45, and the remainder about 30 minutes each. The nurse's role is to guide you to identify and address any support needs. You may also be invited to describe your experiences of the program in a 10 minute phone interview.

### **Are there any benefits to being in the project?**

We can't promise any benefits for you from participation in the study. However, you may like to contribute to a study that might help some carers.

### **Are there any potential risks?**

There are no expected risks. You might sometimes feel tired or upset talking about the problems you face. Involvement in the study will also take some of your time.

### **What will happen to my information?**

All the information we collect from you is confidential. Information you provide for the study will be identified by a code. All the information we collect from you will be securely stored at the University or hospital.

### **Will you tell me the results of the research?**

You can ask for your own results (your summarised responses to the questionnaires) at any point during this study and at the end. Reports of the study may be published but you will not be identifiable.

### **Who can I contact about the research?**

If you would like a researcher to contact you about becoming involved, you can contact our research team: Tammy Weselman, mob) 0410 426 005 or complete your details, tear off the section below and make sure it is put into the box provided at the nurses' station.

✕.....

Full Name: \_\_\_\_\_

Daytime phone number: \_\_\_\_\_ Mobile phone number: \_\_\_\_\_

## Participant Information Sheet/Consent Form (Western Australia)

### Interventional Study – Family Carer providing own consent

|                                                                    |                                                                                                                                                                               |
|--------------------------------------------------------------------|-------------------------------------------------------------------------------------------------------------------------------------------------------------------------------|
| <b>Title</b>                                                       | Multicentre randomised controlled trial: caregiver, patient, and system outcomes from a program supporting informal caregivers of older people discharged home from hospital  |
| <b>Short Title</b>                                                 | Evaluating the Further Enabling Care at Home (FECH) post-discharge program as a way to support carers of older hospital patients.                                             |
| <b>Protocol Number</b>                                             | APP1157834 Version 6 May 14 2020                                                                                                                                              |
| <b>Project Sponsor</b>                                             | Curtin University                                                                                                                                                             |
| <b>Coordinating Principal Investigator/ Principal Investigator</b> | Professor Anne-Marie Hill                                                                                                                                                     |
| <b>Chief Investigator(s)</b>                                       | Prof Wendy Moyle, Assoc Prof Rachael Moorin, Prof Keith Hill, Assoc Prof Susan Slatyer, Assoc Prof Christina Bryant, Dr Nicholas Waldron, Prof Samar Aoun, Dr Richard Parsons |
| <b>Location</b>                                                    | Sir Charles Gairdner Hospital                                                                                                                                                 |

### Part 1 What does my participation involve?

#### 1 Introduction

You are invited to take part in this study as a carer of an older patient discharged home from Sir Charles Gairdner Hospital. For this study, a carer is defined as a family member or friend who provides regular, unpaid, ongoing home based physical and/or emotional care to an older person. The study is evaluating a program designed to support carers of older hospital patients who are returning home.

This Participant Information Sheet tells you about the research project. It explains what is involved. Knowing what is involved will help you decide if you want to take part in the research.

Please read this information carefully. Ask questions about anything that you don't understand or want to know more about. Before deciding whether or not to take part, you might want to talk about it with a relative, friend, or your local doctor.

#### ***Your participation is voluntary***

Your participation in this study is completely voluntary and there will be no cost to you. If you do not want to take part in this study you do not have to. You should feel under no obligation to participate in this study. Choosing not to take part in this study will not affect your current and future medical care in any way. Care within the hospital for the person for whom you provide care, and for you (if required), will not be affected whether or not you take part. If you decide you want to take part in the research project, you will be asked to sign the consent form. By signing it you are telling us that you:

- 1 ■ Understand what you have read.
- 2 ■ Consent to take part in the research project.
- 3 ■ Consent to take part in the assessments and program that are described.
- 4 ■ Consent to the use of your personal and health information as described.

5 You will be given a copy of this Participant Information and Consent Form to keep.

### 6 **Your withdrawal from the study**

7 You are under no obligation to continue with the research study. You may change your mind at any  
8 time about participating in the research. People withdraw from studies for various reasons and you do  
9 not need to provide a reason.

10 You can withdraw from the study at any time by completing and signing the '**Participant Withdrawal  
11 of Consent Form**'. This form is provided at the end of this document, and is to be completed by you  
12 and supplied to the research team if you choose to withdraw at a later date. If you withdraw from the  
13 study, you will be able to choose whether the study will destroy or retain the information it has collected  
14 about you. You should only choose **one** of these options. Where both boxes are ticked in error or  
15 neither box is ticked, the study will destroy all information it has collected about you.

## 16 **2 What is the purpose of this research?**

17 This study is being conducted to evaluate how providing extra support for family carers - after the older  
18 person for whom they provide care is discharged from hospital - affects these carers, the older patients  
19 themselves, and the Australian health system.

20 This study will trial the *Further Enabling Care at Home (FECH)* telephone outreach program, which  
21 was first evaluated in 2016 at Sir Charles Gairdner Hospital in Western Australia. In that smaller project,  
22 the FECH program was found to improve how prepared carers felt to provide care and to reduce their  
23 stress. We now want to see if the FECH program benefits family carers and the older persons receiving  
24 their care over the longer term as well as being affordable for the Australian health system.

25 This research was initiated by Associate Professor Christine Toye of Curtin University. This research  
26 has been funded by an Australian National Health and Medical Research Council (NHMRC) Project  
27 grant and by Curtin University.

## 28 **3 What does participation in this research involve?**

29 If you agree to take part, you will continue to receive the usual support provided to carers of patients  
30 discharged from this hospital. After you sign and return the consent form, a research assistant will  
31 telephone you to arrange a convenient time for an initial telephone survey. This call, conducted just  
32 after the discharge, will collect details about you, the older person for whom you provide care, and the  
33 care services accessed to support the older person. Responses you provide over the telephone will be  
34 entered into an electronic database by the person who calls you.

35 The study is seeking to determine how a particular type of additional support for family carers may  
36 provide benefits for them and the patients for whom they provide care – and any costs or cost savings  
37 that the health system may incur as a result. To achieve this, some family carers will receive existing  
38 support and some will receive existing support plus additional support. You will be randomly allocated,  
39 like tossing a coin, to either receive usual post-discharge support, or to receive usual post-discharge  
40 support plus the FECH program. If you take part in the FECH program, the details you have provided  
41 about yourself, the care you provide, and the older person's health plus their care and support needs  
42 will also be provided to the nurse who delivers that program. This is so that the program can take  
43 account of the caregiving situation and you don't need to be asked these questions again.

The FECH program consists of **6 telephone contacts from a nurse in the first 6 months after discharge**. If you are included in the program, each telephone call will be organised to take place at a time that suits you. The first contact will be approximately one week after discharge and take about 15 minutes. We will check some details about you and the care you provide to the older person following discharge. The second telephone call will be about a week later (2-weeks post-discharge) and take approximately 45 minutes. This is when you will be asked about any support needs you have and the nurse will work with you to find ways of addressing these needs. You will then be called again at approximately 1, 2, 4, and 6 months after the discharge, with each telephone call taking approximately 30 minutes. These calls will review your support needs and how they are being met or if they are still to be addressed. To check that the program is being conducted as planned, one of these sessions may be digitally audio recorded.

Some carers who receive the FECH program will also be invited to participate in an individual interview to explore their thoughts about the program, both during and after the FECH program has finished. These interviews will be conducted over the telephone with an experienced interviewer and will take around 10 minutes. Any identifying information will be removed when the interview is typed up and the digital audio recording erased from the recorder. The audio recording will then only be in a secure password protected file until analysis is complete, after which it will be deleted. Some quotes may be used when writing the results up, but individuals will not be identifiable.

**All carers who take part, whether receiving usual support only or usual support plus the FECH program, will be asked to complete questionnaires just after the discharge and 3 months, 6 months, and 12 months later.** We will call you just after the discharge to ask for some details about you, the person for whom you provide care, and the care you provide, which will take about 30 minutes. You can then complete the questionnaires over the telephone or electronically (your choice on each occasion). Each time you answer the questionnaires it will take about 20-30 minutes. Questions are mainly about your health and well-being but we also seek information about the care needs of the person for whom you provide care and any care services accessed. We will call to remind you when questionnaires are due to be answered. If you are answering these over the phone, we will arrange a suitable time with you. If the patient (the person for whom you provide care) is unable to rate their symptoms over the phone we will ask you to do this instead.

### ***How long does the study last?***

Your participation in the study would be for 12 months. If a time arranged for us to call becomes inconvenient, you can call the following number mob) 0413 097 981 to postpone the calls to ensure that we do not trouble you.

### ***What other information is collected?***

So that we can understand how this project benefits the Australian health system, we will collect health care information. We will need information about your use of emergency departments; details of hospital stays; mortality; any Medicare funded services, such as visits to your GP; and medications prescribed – for the 12 months prior and at least 12 months following your agreement to take part in this study, that is, up until December 31 2022. **These data are already routinely collected** and will be provided to our study team by the Data Linkage Branch of the Department of Health of Western Australia and Services Australia. This information will allow us to check the extent of any increased or decreased use of health services or medicines – and related costs to the system - when a carer is included in the FECH program. For example, carers may visit a doctor and be prescribed medicine if they become stressed or are injured when providing care, which would incur costs covered by Medicare or the Pharmaceutical Benefits Scheme. If carer inclusion in the FECH program means that this happens less often, costs to the system would be reduced, which might then justify costs to run the program.

## **Medicare Benefits Schedule (MBS) and/or Pharmaceutical Benefits Scheme (PBS)**

You will be asked to sign a consent form authorising the study to access your complete Medicare Benefits Schedule (MBS) and/or Pharmaceutical Benefits Scheme (PBS) data as outlined in the consent form. Medicare collects information on your doctor visits and the associated costs, while the PBS collects information on the prescription medications you have filled at pharmacies. The consent form is sent securely to Services Australia, which holds MBS and PBS data confidentially.

### **What if the person for whom I provide care does not understand about this study?**

If the person for whom you provide care is unable to read and understand the study information at the time of the hospital discharge, we are still able to include information already routinely collected for that person by the Department of Health of Western Australian in the study if you agree. This is the same kind of information described in the previous paragraph, but for the patient rather than for you. If this is the case, you will also be asked to provide the enclosed Patient Participant Information Sheet to the older person for whom you provide care (the patient), if and when they are well enough to read and understand this document. This information sheet is accompanied by an 'opt out' form, which provides an opportunity for the older person to refuse consent for information about him or her to be used for this study at that later date.

*The opt out form would need to be returned by December 31<sup>st</sup> 2022 for the patient's data not to be used in the study, if this is their choice*

Unless this form is returned, information that you provide as a carer will be linked with the patient's information during our study. This is to determine any impact upon the patient's use of health services from the way in which support is provided for the carer.

### Is there any cost involved if I take part in the study?

There are no additional costs associated with taking part in this research project, nor will you be paid.

## **4 What do I have to do?**

If you would like to take part in the study, you should sign and return the consent form to the research team member who is there to answer your questions, by email Tammy.Weselman@curtin.edu.au, or in the reply paid envelope provided. If you have questions and the research team member is not there, if it is too difficult to return the consent form in this way, or if you would prefer not to take part, please call us on mob) 0413 097 981.

## **5 Other relevant information about the research project**

This research project is taking place in Western Australia and Queensland and includes older patients discharged from hospital wards in Sir Charles Gairdner Hospital in Western Australia and Robina and Gold Coast University hospitals in Queensland and their family carers. We are seeking 648 family carers and 648 patients (1,296 people in total) to complete the study. A carer cannot be included if the person for whom they provide care declines the opportunity to take part in the study.

## **6 Do I have to take part in this research project?**

As stated before, your decision to take part in this study is **voluntary**, that is, you may decide to be in this study or not take part in it at all. If you do decide to take part, you are able to change your mind at any time during the study. However, before you make any decision, it is important that you understand why this study is being done and what it will involve, including your rights and responsibilities. You will

be given a copy of this Participant Information Sheet and Consent Form to keep for your personal record. Any decision you make will not affect any benefit to which you would otherwise be entitled.

## **7 What are the alternatives to participation?**

You do not have to take part in this research project to receive treatment at this hospital. If you do not wish to participate, you will receive usual support provided to patients and their families after discharge.

## **8 What are the possible benefits of taking part?**

You may not receive any benefit from taking part in this study. You may enjoy sharing your caregiving experience, and having an opportunity to contribute to a study that is intended to benefit family carers, patients, and the health care system in the longer term. Some participants will receive advice and guidance from a nurse that has helped carers to feel better prepared to provide care and/or less stressed in a previous study. However, we cannot guarantee that such advice will be helpful for you or that you will receive it.

## **9 What are the possible risks and disadvantages of taking part?**

There are no risks anticipated, although you may feel tired or upset when talking about any problems. You can choose to take a break during any telephone calls or when answering questionnaires online, and continue when you are ready, or another day, or end your participation altogether. Usual post-discharge support provided by the hospital will not be affected.

## **10 Can I use other support services and health information during this research project?**

You may access services and information outside of this project to help you in your caring role. We will ask you about these services and information so we can document this.

## **11 What if I withdraw from this research project?**

If you do withdraw your consent during the research project, please use the attached withdrawal form to do so. The member of the research team can provide a replacement if you cannot find this form. You are also most welcome to call a member of the research team with any queries on mob) 0413 097 981

## **12 What happens when the research project ends?**

At the end of the research project you will not be required to do anything else. A summary of the findings of this study will be made available to you upon request at the end of the study.

## **Part 2 How is the research project being conducted?**

### **13 What will happen to information about me?**

By signing the consent form, you give permission for the study research staff to collect and use your personal information for the research project. Any information obtained in connection with this research project that can identify you will remain confidential. The information you contribute for this study will be identified by a code although, as we conduct the study, we will use your name, for example, when we call you. We will also use your email address if you choose to complete the questionnaires electronically. Only authorised persons, who understand that this information must be kept confidential, will have access to individual contributions, participant names, or email addresses. Access to study information is authorised and logged via the Research Governance System of the Department of Health of Western Australia.



1 Information about you may be obtained from your health records held at this and other health services  
2 for the purpose of this research. By signing the consent form you agree to the study team accessing  
3 health records if they are relevant to your participation in this research project. Your health records and  
4 any information obtained during the research project may be checked (to verify the procedures and the  
5 data) by the relevant authorities and authorised representatives. Authorised authorities include the  
6 Human Research Ethics Committees of the Department of Health of Western Australia, the Sir Charles  
7 Gairdner Osborne Park Health Care Group, Gold Coast Health, Curtin University, and Griffith  
8 University, plus the relevant Hospital's Research Governance Department. If this should occur, these  
9 personnel are required to comply with the privacy laws that protect you when dealing with your  
10 information. By signing the Consent Form, you authorise release of, or access to, this confidential  
11 information to the relevant study personnel and regulatory authorities as noted above.

### 12 ***Storage, retention and destruction of your information***

13 In Western Australia, participant records in hard copy, including consent forms, will be kept during the  
14 study in the Centre for Nursing Research at Sir Charles Gairdner Hospital. At the end of the study, any  
15 such documents will be provided to Curtin University using a secure method. All electronic study data  
16 – which include the questionnaire data, interview transcripts, and the data provided by the Department  
17 of Health of Western Australian and/or Services Australia (MBS and PBS data) - will be stored on a  
18 secure drive at Curtin University.

19 Data will be archived and finally securely destroyed according to the archiving rules of the relevant  
20 University and Health Department Guidelines, and the guidelines provided by Services Australia, as  
21 agreed by the Human Research Ethics Committees that have approved this study. Paper documents  
22 will be disposed of in a secure waste bin and electronic data will be deleted in such a way that they  
23 cannot be recovered. In accordance with the requirements of Curtin University, the study's  
24 questionnaire data will be retained for 25 years following the date of publication of study findings but  
25 the data obtained from your health records, including that provided by the Department of Health of  
26 Western Australian and/or Services Australia (MBS and PBS data), will be destroyed 7 years after  
27 publication of study findings.

28 Results of this research project will be published and/or presented in a variety of forums. In any  
29 publication and/or presentation, information will be provided in such a way that you cannot be identified.  
30 All health results will be presented as group data, meaning individuals cannot be identified. Any quotes  
31 from interviews that are presented will be identified only with the study number used to describe the  
32 carer (eg, Carer 1, Carer 2). The processes that have been approved for this study ensure that the  
33 data we access from State and Federal Departments are de-identified prior to inclusion in the study  
34 analyses and cannot thereafter be re-identified. Furthermore, these data will be provided to us via the  
35 secure methods determined by these Departments.

36 After the study is completed, non-identifiable questionnaire data may be used again by our research  
37 team (for example when additional testing of the Further Enabling Care at Home program is  
38 undertaken) but the data obtained from your health records, including that provided by the Department  
39 of Health of Western Australians and/or Services Australia will not be used in any future or unspecified  
40 research outside of the approved study and will only be disclosed with your permission, except as  
41 required by law. Any information obtained for the purpose of this research project that can identify you  
42 will be treated as confidential and securely stored. It will be disclosed only with your permission, or as  
43 required by law.

### 44 ***Accessing your information***

45 In accordance with relevant Australian and/or Western Australian privacy and other relevant laws, you  
46 have the right to request access to your information collected and stored by the research team. You  
47 also have the right to request that any information with which you disagree be corrected. However, the  
48  
49  
50  
51  
52  
53  
54  
55

data from the Department of Health of Western Australian and/or Services Australia will have been de-identified so the only information we can provide will have been provided to us via questionnaires or interviews. Please contact Anne-Marie Hill via email: [anne-marie.hill@curtin.edu.au](mailto:anne-marie.hill@curtin.edu.au), if you would like to access a summary of your questionnaire data or a transcript of your interview.

#### 14 Who is organising and funding the research?

This research is led by Professor Anne-Marie Hill of Curtin University. The study is being conducted by Curtin University in Western Australia and Griffith University in Queensland and is funded by the National Health and Medical Research Council (NHMRC) of Australia and Curtin University. Researchers from other universities, from WA Health, and from Queensland Health are also in the study team. You will not benefit financially from your involvement in this research project even if, for example, study findings prove to be of commercial value to the Australian health system. No member of the research team will receive a personal financial benefit from your involvement in this research project (other than their ordinary wages).

#### 15 Who has reviewed the research project?

All research in Australia involving humans is reviewed by an independent group of people called a Human Research Ethics Committee (HREC). The Human Research Ethics Committees of the Department of Health of Western Australia, the Sir Charles Gairdner Osborne Park Health Care Group, Curtin University, and Griffith University have reviewed this study and given approval for the conduct of this research. In doing so, this research conforms to the principles set out by the National Statement on Ethical Conduct in Human Research (2007) and abides by the Good Clinical Practice Guidelines.

#### 16 Further information and who to contact

If you have any questions about the study you can contact: WA State Manager, Trish Starling (mob) 0413 097 981, email: [trish.starling@curtin.edu.au](mailto:trish.starling@curtin.edu.au)

If you have any complaints about any aspect of the project, the way it is being conducted or any questions about being a research participant in general, then you may contact:

#### Reviewing HREC approving this research and HREC Executive Officer details

|                        |                                                     |
|------------------------|-----------------------------------------------------|
| Reviewing HREC name    | Sir Charles Gairdner Osborne Park Health Care Group |
| HREC Executive Officer |                                                     |
| Telephone              | 08 6457 2999                                        |
| Email                  | SCGH.HREC@health.wa.gov.au                          |

✂.....

#### 17 If you are happy to be contacted

Thank you for reading this Participant Information Sheet. If you would like a researcher to contact you about becoming involved, you can contact our research officer, Tammy Weselman, (mob) 0410 426 005 or complete your details on this page and make sure it is put into the box provided at the nurses' station.

Full Name: \_\_\_\_\_

Daytime phone number: \_\_\_\_\_ Mobile phone number: \_\_\_\_\_

**Consent Form – Family carer providing own consent – Western Australia**

|                                                                        |                                                                                                                                                                               |
|------------------------------------------------------------------------|-------------------------------------------------------------------------------------------------------------------------------------------------------------------------------|
| <b>Title</b>                                                           | Multicentre randomised controlled trial: caregiver, patient, and system outcomes from a program supporting informal caregivers of older people discharged home from hospital  |
| <b>Short Title</b>                                                     | Evaluating the Further Enabling Care at Home (FECH) post-discharge program as a way to support carers of older hospital patients.                                             |
| <b>Protocol Number</b>                                                 | APP1157834 Version 6 May 14 2020                                                                                                                                              |
| <b>Project Sponsor</b>                                                 | Curtin University                                                                                                                                                             |
| <b>Coordinating Principal Investigator/<br/>Principal Investigator</b> | Professor Anne-Marie Hill                                                                                                                                                     |
| <b>Chief Investigator(s)</b>                                           | Prof Wendy Moyle, Assoc Prof Rachael Moorin, Prof Keith Hill, Assoc Prof Susan Slatyer, Assoc Prof Christina Bryant, Dr Nicholas Waldron, Prof Samar Aoun, Dr Richard Parsons |
| <b>Location</b>                                                        | Sir Charles Gairdner Hospital                                                                                                                                                 |

**Declaration by Participant**

I have read the Participant Information Sheet or someone has read it to me in a language that I understand.

I understand the purposes, procedures and risks of the research described in the project.

If requested, I am happy to take part in a digitally audio-recorded interview. Yes  No

I understand that the answers I have provided to questionnaires may be used again - in a non-identifiable format – by this research team, for example, when this team continues testing the Further Enabling Care at Home program.

I give permission for the research team to access information about me for the purposes of this project from the Data Linkage Branch of the Department of Health of Western Australia. This information will include data routinely collected for the 12 months before the date of the pending or most recent hospital discharge of the older person for whom I provide care (from the hospitalisation when I was identified as suitable for this study) and for the 12 months that follow or December 31 2022 (whichever date is later) about:

- use of ambulance services and hospital emergency departments
- length of hospital stays and related diagnoses or other details relating to hospital admissions and/or mortality.

I understand that such information will remain confidential and will not be reported in any way that could identify me.

I also understand that, to access this information, the research team will need to provide information about me that may include my full name, date of birth, sex, and address to the Data Linkage Branch of the Department of Health of Western Australia.

1 I have had an opportunity to ask questions and I am satisfied with the answers I have received.

2  
3 I freely agree to participate in this research project as described and understand that I am free to  
4 withdraw at any time during the study without affecting my future health care.

5  
6 I understand that I will be given a signed copy of this document to keep.

7  
8 I understand that Curtin University is not part of the Sir Charles Gairdner Hospital or the Government  
9 of Western Australia and health professionals involved in the conduct of this study do so in a private  
10 capacity and not as employees of the hospital or the State.  
11

|                                                                            |  |      |  |
|----------------------------------------------------------------------------|--|------|--|
| 12                                                                         |  |      |  |
| 13 Full name of Participant (please print first, middle, and last IN FULL) |  |      |  |
| 14                                                                         |  |      |  |
| 15                                                                         |  |      |  |
| 16                                                                         |  |      |  |
| 17 Date of birth                                                           |  |      |  |
| 18                                                                         |  |      |  |
| 19                                                                         |  |      |  |
| 20                                                                         |  |      |  |
| 21                                                                         |  |      |  |
| 22 Home (street) address (including suburb and postcode)                   |  |      |  |
| 23                                                                         |  |      |  |
| 24                                                                         |  |      |  |
| 25                                                                         |  |      |  |
| 26                                                                         |  |      |  |
| 27 Email address                                                           |  |      |  |
| 28                                                                         |  |      |  |
| 29                                                                         |  |      |  |
| 30                                                                         |  |      |  |
| 31 Telephone number                                                        |  |      |  |
| 32                                                                         |  |      |  |
| 33                                                                         |  |      |  |
| 34                                                                         |  |      |  |
| 35                                                                         |  |      |  |
| 36                                                                         |  |      |  |
| 37                                                                         |  |      |  |
| 38                                                                         |  |      |  |
| 39                                                                         |  |      |  |
| 40                                                                         |  |      |  |
| Signature                                                                  |  | Date |  |
| 41                                                                         |  |      |  |

42  
43 **Declaration by Researcher**

44 I have given a verbal explanation of the research project, its procedures and risks and I believe that  
45 the participant has understood that explanation.

|                                                                                 |  |
|---------------------------------------------------------------------------------|--|
| 46                                                                              |  |
| 47                                                                              |  |
| 48 Name Researcher (please print) _____                                         |  |
| 49                                                                              |  |
| 50                                                                              |  |
| 51 Signature _____ Date _____                                                   |  |
| 52                                                                              |  |
| 53                                                                              |  |
| 54 Note: All parties signing the consent section must date their own signature. |  |
| 55                                                                              |  |
| 56                                                                              |  |
| 57                                                                              |  |
| 58                                                                              |  |
| 59                                                                              |  |
| 60                                                                              |  |

**PARTICIPANT WITHDRAWAL OF CONSENT FORM**

**Multicentre randomised controlled trial: caregiver, patient, and system outcomes from a program supporting informal caregivers of older people discharged home from hospital**

Please cross out the non-applicable statements and tick the appropriate box

I wish to WITHDRAW my participation entirely from this study, effective from the date below and request that the study handles the information they have collected about me in the following way (choose one option):

DESTROY all information collected about me so it can no longer be used for research

RETAIN all information collected about me so it can continue to be used for research

I understand that:

1. no further information about me will be collected for the study from the withdrawal date;
2. information about me that has already been analysed and/or included in a publication by the study, may not be able to be destroyed; and
3. choosing to withdraw from the study will not affect my access to Health Services or Government benefits.

.....

**Signature**

.....

**Date**

..... **Please print full name**

Hospital where you first learned of the study

**This form should be forwarded by email to: [anne-marie.hill@curtin.edu.au](mailto:anne-marie.hill@curtin.edu.au).**

**Alternatively, forms can be posted to:  
 Professor Anne-Marie Hill,  
 School of Physiotherapy and Exercise Science,  
 Curtin University, GPO Box S1512, Perth WA 6845.**
